# Supplementary material
Source: publisher figshare collection journal article supplement (https://gsajournals.figshare.com/ndownloader/files/28101915)
Supplement: Supplementary file 1 [file 28101915]

## Sheet: YLC.Alternative_ployA
Gene ID	Isoform ID	Strand	Reads number	APA sites number	Reads each sites	Locations
Gene000001	Isoform000001	+	1	1	1	19707
Gene000002	Isoform000002	+	1	1	1	30322
Gene000002	Isoform000003	+	1	1	1	30277
Gene000002	Isoform000004	+	1	1	1	30322
Gene000002	Isoform000005	+	1	1	1	30276
Gene000002	Isoform000006	+	1	1	1	30261
Gene000002	Isoform000007	+	1	1	1	30372
Gene000003	Isoform000008	+	1	1	1	288188
Gene000004	Isoform000009	+	1	1	1	388890
Gene000005	Isoform000010	+	2	2	1|1	632769|632835
Gene000005	Isoform000011	+	1	1	1	632836
Gene000006	Isoform000012	+	4	4	1|1|1|1	721953|722070|722096|722174
Gene000007	Isoform000013	+	1	1	1	905588
Gene000007	Isoform000014	+	3	2	2|1	803752|803753
Gene000007	Isoform000015	+	1	1	1	905586
Gene000007	Isoform000016	+	1	1	1	905588
Gene000008	Isoform000017	+	1	1	1	1022897
Gene000009	Isoform000018	+	5	5	1|1|1|1|1	1050944|1051014|1051020|1051126|1051193
Gene000010	Isoform000019	+	2	1	2	1057743
Gene000010	Isoform000020	+	1	1	1	1057754
Gene000011	Isoform000021	+	1	1	1	1163911
Gene000011	Isoform000022	+	1	1	1	1164307
Gene000012	Isoform000023	+	3	3	1|1|1	1167819|1168083|1169841
Gene000013	Isoform000024	+	1	1	1	1189408
Gene000013	Isoform000025	+	2	2	1|1	1189405|1189469
Gene000013	Isoform000026	+	1	1	1	1189417
Gene000014	Isoform000027	+	465	72	1|1|1|1|1|1|12|5|1|1|1|1|1|1|1|1|4|1|1|1|2|1|5|29|5|2|1|1|2|4|3|3|4|20|17|14|18|7|17|74|44|2|2|20|23|19|20|7|2|3|1|2|4|7|3|6|4|1|2|2|1|2|1|1|1|3|9|2|1|1|1|1	1289253|1289257|1289271|1289272|1289273|1289274|1289275|1289276|1289281|1289283|1289288|1289291|1289299|1289300|1289304|1289314|1289317|1289327|1289330|1289331|1289359|1289360|1289361|1289362|1289363|1289371|1289375|1289376|1289377|1289378|1289379|1289380|1289383|1289384|1289385|1289386|1289388|1289390|1289392|1289393|1289394|1289395|1289396|1289398|1289399|1289400|1289402|1289404|1289407|1289409…
Gene000014	Isoform000028	+	1	1	1	1289379
Gene000014	Isoform000029	+	1	1	1	1289428
Gene000014	Isoform000030	+	1	1	1	1289400
Gene000014	Isoform000031	+	1	1	1	1289394
Gene000014	Isoform000032	+	7	6	1|1|1|1|2|1	1289299|1289378|1289384|1289386|1289393|1289446
Gene000015	Isoform000033	-	1	1	1	265514
Gene000016	Isoform000034	-	5	5	1|1|1|1|1	476846|476918|476925|476979|477060
Gene000016	Isoform000035	-	1	1	1	476926
Gene000017	Isoform000036	-	1	1	1	576445
Gene000018	Isoform000037	-	1	1	1	717824
Gene000019	Isoform000038	-	4	4	1|1|1|1	905498|905529|905551|905552
Gene000019	Isoform000039	-	1	1	1	905525
Gene000019	Isoform000040	-	1	1	1	905526
Gene000019	Isoform000041	-	1	1	1	905529
Gene000019	Isoform000042	-	3	2	2|1	905529|905552
Gene000019	Isoform000043	-	1	1	1	905529
Gene000019	Isoform000044	-	3	3	1|1|1	905529|905552|905553
Gene000019	Isoform000045	-	1	1	1	905552
Gene000020	Isoform000046	-	2	2	1|1	1024167|1024174
Gene000021	Isoform000047	-	1	1	1	1114323
Gene000022	Isoform000048	-	1	1	1	1190848
Gene000023	Isoform000049	-	1	1	1	1291506
Gene000023	Isoform000050	-	1	1	1	1291631
Gene000023	Isoform000051	-	1	1	1	1291633
Gene000024	Isoform000052	-	1	1	1	1324060
Gene000025	Isoform000053	-	1	1	1	1336715
Gene000025	Isoform000054	-	1	1	1	1336862
Gene000026	Isoform000055	+	1	1	1	150465
Gene000026	Isoform000056	+	1	1	1	141659
Gene000027	Isoform000057	+	1	1	1	423754
Gene000028	Isoform000058	+	2	2	1|1	500412|500699
Gene000028	Isoform000059	+	3	3	1|1|1	500412|500498|501076
Gene000028	Isoform000060	+	2	2	1|1	502865|502913
Gene000028	Isoform000061	+	2	2	1|1	502875|502943
Gene000028	Isoform000062	+	1	1	1	490735
Gene000028	Isoform000063	+	1	1	1	502858
Gene000028	Isoform000064	+	2	2	1|1	494058|494082
Gene000029	Isoform000065	+	1	1	1	599782
Gene000030	Isoform000066	-	1	1	1	224528
Gene000031	Isoform000067	-	1	1	1	390371
Gene000032	Isoform000068	-	1	1	1	413909
Gene000032	Isoform000069	-	2	2	1|1	413909|415406
Gene000032	Isoform000070	-	1	1	1	414006
Gene000033	Isoform000071	-	1	1	1	424945
Gene000033	Isoform000072	-	1	1	1	424951
Gene000034	Isoform000073	-	1	1	1	447145
Gene000035	Isoform000074	-	1	1	1	474493
Gene000036	Isoform000075	-	3	3	1|1|1	621775|621826|621876
Gene000036	Isoform000076	-	1	1	1	622440
Gene000037	Isoform000077	-	3	3	1|1|1	631593|632591|632678
Gene000037	Isoform000078	-	1	1	1	631663
Gene000038	Isoform000079	+	1	1	1	103385
Gene000039	Isoform000080	+	3	3	1|1|1	150140|150200|150261
Gene000039	Isoform000081	+	1	1	1	150134
Gene000039	Isoform000082	+	1	1	1	150263
Gene000040	Isoform000083	+	1	1	1	170281
Gene000040	Isoform000084	+	1	1	1	171991
Gene000040	Isoform000085	+	2	2	1|1	172012|172334
Gene000040	Isoform000086	+	1	1	1	172013
Gene000040	Isoform000087	+	1	1	1	170254
Gene000041	Isoform000088	+	2	2	1|1	303323|303388
Gene000041	Isoform000089	+	1	1	1	296739
Gene000041	Isoform000090	+	2	2	1|1	303202|303325
Gene000041	Isoform000091	+	1	1	1	303226
Gene000041	Isoform000092	+	1	1	1	303327
Gene000042	Isoform000093	+	2	2	1|1	314343|314438
Gene000043	Isoform000094	-	1	1	1	4322
Gene000044	Isoform000095	-	2	1	2	180817
Gene000045	Isoform000096	-	2	2	1|1	193041|193173
Gene000045	Isoform000097	-	1	1	1	193054
Gene000045	Isoform000098	-	1	1	1	197777
Gene000046	Isoform000099	-	1	1	1	226973
Gene000046	Isoform000100	-	2	2	1|1	226984|227059
Gene000046	Isoform000101	-	1	1	1	227061
Gene000047	Isoform000102	-	1	1	1	318614
Gene000048	Isoform000103	-	1	1	1	326310
Gene000048	Isoform000104	-	2	2	1|1	326310|326512
Gene000048	Isoform000105	-	1	1	1	326412
Gene000049	Isoform000106	+	2	2	1|1	15526|15574
Gene000049	Isoform000107	+	1	1	1	15525
Gene000050	Isoform000108	+	1	1	1	33277
Gene000050	Isoform000109	+	4	4	1|1|1|1	33141|33176|33182|33250
Gene000051	Isoform000110	+	1	1	1	41232
Gene000052	Isoform000111	+	1	1	1	93601
Gene000052	Isoform000112	+	2	2	1|1	49909|49993
Gene000052	Isoform000113	+	1	1	1	55470
Gene000052	Isoform000114	+	4	3	1|1|2	81352|81353|81410
Gene000053	Isoform000115	+	12	11	1|2|1|1|1|1|1|1|1|1|1	147667|147719|147814|147851|147863|147866|147868|147937|148005|149048|149050
Gene000054	Isoform000116	+	1	1	1	168118
Gene000054	Isoform000117	+	1	1	1	168121
Gene000055	Isoform000118	+	1	1	1	246611
Gene000056	Isoform000119	+	2	2	1|1	271610|271771
Gene000056	Isoform000120	+	1	1	1	271580
Gene000056	Isoform000121	+	1	1	1	271612
Gene000056	Isoform000122	+	1	1	1	270749
Gene000056	Isoform000123	+	1	1	1	270873
Gene000057	Isoform000124	+	1	1	1	281794
Gene000058	Isoform000125	+	5	5	1|1|1|1|1	292055|292080|292117|292136|292176
Gene000058	Isoform000126	+	1	1	1	292053
Gene000059	Isoform000127	+	1	1	1	299419
Gene000060	Isoform000128	+	1	1	1	320351
Gene000061	Isoform000129	+	1	1	1	344813
Gene000062	Isoform000130	+	2	2	1|1	504314|504343
Gene000063	Isoform000131	+	2	2	1|1	546734|546812
Gene000063	Isoform000132	+	1	1	1	546736
Gene000064	Isoform000133	+	4	4	1|1|1|1	601088|601160|601219|601288
Gene000064	Isoform000134	+	1	1	1	601152
Gene000064	Isoform000135	+	1	1	1	601208
Gene000064	Isoform000136	+	1	1	1	579775
Gene000065	Isoform000137	+	1	1	1	677274
Gene000065	Isoform000138	+	1	1	1	677273
Gene000066	Isoform000139	+	2	2	1|1	760253|760467
Gene000067	Isoform000140	+	1	1	1	1126619
Gene000067	Isoform000141	+	7	4	1|1|3|2	1126133|1126153|1126194|1126195
Gene000067	Isoform000142	+	1	1	1	1126593
Gene000068	Isoform000143	+	1	1	1	1169168
Gene000069	Isoform000144	+	1	1	1	1172950
Gene000070	Isoform000145	+	1	1	1	1206594
Gene000071	Isoform000146	+	1	1	1	1243813
Gene000072	Isoform000147	+	2	2	1|1	1269333|1269336
Gene000072	Isoform000148	+	1	1	1	1269847
Gene000073	Isoform000149	-	4	4	1|1|1|1	58508|58667|58885|59387
Gene000073	Isoform000150	-	1	1	1	59382
Gene000074	Isoform000151	-	2	2	1|1	69588|69639
Gene000074	Isoform000152	-	1	1	1	69593
Gene000075	Isoform000153	-	2	2	1|1	81911|81935
Gene000075	Isoform000154	-	1	1	1	83804
Gene000075	Isoform000155	-	1	1	1	83804
Gene000075	Isoform000156	-	1	1	1	113548
Gene000075	Isoform000157	-	1	1	1	82924
Gene000075	Isoform000158	-	1	1	1	83796
Gene000075	Isoform000159	-	1	1	1	83800
Gene000075	Isoform000160	-	1	1	1	83800
Gene000076	Isoform000161	-	1	1	1	254381
Gene000077	Isoform000162	-	1	1	1	292536
Gene000078	Isoform000163	-	18	17	1|1|1|1|1|1|1|1|1|1|1|2|1|1|1|1|1	299566|299685|299689|299697|299709|299722|299723|299751|299767|299777|299788|299819|299821|299852|299861|299862|300047
Gene000078	Isoform000164	-	3	3	1|1|1	299697|299752|299861
Gene000078	Isoform000165	-	1	1	1	299723
Gene000078	Isoform000166	-	1	1	1	299751
Gene000078	Isoform000167	-	1	1	1	299766
Gene000078	Isoform000168	-	2	2	1|1	299778|299862
Gene000078	Isoform000169	-	1	1	1	299915
Gene000079	Isoform000170	-	1	1	1	324035
Gene000079	Isoform000171	-	1	1	1	324037
Gene000080	Isoform000172	-	1	1	1	357617
Gene000081	Isoform000173	-	3	3	1|1|1	360012|360025|360059
Gene000081	Isoform000174	-	1	1	1	360059
Gene000081	Isoform000175	-	1	1	1	360090
Gene000081	Isoform000176	-	1	1	1	360097
Gene000081	Isoform000177	-	1	1	1	360023
Gene000081	Isoform000178	-	1	1	1	360024
Gene000081	Isoform000179	-	1	1	1	360025
Gene000081	Isoform000180	-	1	1	1	360025
Gene000081	Isoform000181	-	1	1	1	360025
Gene000081	Isoform000182	-	1	1	1	360037
Gene000081	Isoform000183	-	1	1	1	360042
Gene000081	Isoform000184	-	1	1	1	360059
Gene000082	Isoform000185	-	1	1	1	463778
Gene000083	Isoform000186	-	1	1	1	793689
Gene000084	Isoform000187	-	10	7	2|2|1|1|2|1|1	819226|819232|819317|819374|819392|819464|819736
Gene000084	Isoform000188	-	1	1	1	819233
Gene000084	Isoform000189	-	1	1	1	819346
Gene000085	Isoform000190	-	1	1	1	1131127
Gene000085	Isoform000191	-	1	1	1	1131157
Gene000086	Isoform000192	-	3	3	1|1|1	1173302|1173403|1173446
Gene000087	Isoform000193	-	3	3	1|1|1	1218591|1218603|1218652
Gene000088	Isoform000194	-	2	2	1|1	1269352|1269353
Gene000089	Isoform000195	-	1	1	1	1281263
Gene000089	Isoform000196	-	1	1	1	1281274
Gene000089	Isoform000197	-	1	1	1	1281281
Gene000089	Isoform000198	-	1	1	1	1281283
Gene000089	Isoform000199	-	1	1	1	1281283
Gene000089	Isoform000200	-	1	1	1	1282380
Gene000089	Isoform000201	-	1	1	1	1284823
Gene000089	Isoform000202	-	1	1	1	1294289
Gene000089	Isoform000203	-	2	2	1|1	1281200|1281283
Gene000089	Isoform000204	-	1	1	1	1281229
Gene000089	Isoform000205	-	1	1	1	1281262
Gene000089	Isoform000206	-	1	1	1	1281262
Gene000089	Isoform000207	-	1	1	1	1281262
Gene000089	Isoform000208	-	1	1	1	1281262
Gene000089	Isoform000209	-	1	1	1	1281262
Gene000090	Isoform000210	-	1	1	1	1315929
Gene000091	Isoform000211	-	2	1	2	1
Gene000092	Isoform000212	+	1	1	1	256727
Gene000093	Isoform000213	+	1	1	1	333610
Gene000093	Isoform000214	+	1	1	1	331433
Gene000094	Isoform000215	+	1	1	1	359540
Gene000095	Isoform000216	+	2	2	1|1	363288|363365
Gene000096	Isoform000217	+	1	1	1	384608
Gene000097	Isoform000218	+	10	8	1|1|2|1|1|1|2|1	413536|413584|413586|413588|413597|413669|413674|413747
Gene000098	Isoform000219	+	1	1	1	682889
Gene000098	Isoform000220	+	1	1	1	682888
Gene000098	Isoform000221	+	2	2	1|1	682941|682956
Gene000099	Isoform000222	-	3	3	1|1|1	303372|303510|303511
Gene000100	Isoform000223	-	2	2	1|1	365137|365512
Gene000101	Isoform000224	-	1	1	1	683986
Gene000101	Isoform000225	-	1	1	1	684026
Gene000101	Isoform000226	-	1	1	1	693538
Gene000102	Isoform000227	-	1	1	1	712939
Gene000102	Isoform000228	-	3	3	1|1|1	712939|713034|713036
Gene000102	Isoform000229	-	1	1	1	723562
Gene000103	Isoform000230	+	1	1	1	218394
Gene000104	Isoform000231	-	1	1	1	45984
Gene000105	Isoform000232	-	1	1	1	68516
Gene000106	Isoform000233	-	2	2	1|1	119350|119370
Gene000107	Isoform000234	-	1	1	1	131404
Gene000107	Isoform000235	-	1	1	1	131431
Gene000108	Isoform000236	-	5	5	1|1|1|1|1	191102|192104|192237|192305|192338
Gene000109	Isoform000237	-	3	3	1|1|1	238601|238682|238760
Gene000110	Isoform000238	-	2	2	1|1	249696|249766
Gene000110	Isoform000239	-	2	2	1|1	249768|249827
Gene000110	Isoform000240	-	1	1	1	252404
Gene000110	Isoform000241	-	1	1	1	252404
Gene000110	Isoform000242	-	1	1	1	252405
Gene000111	Isoform000243	-	5	4	1|1|2|1	274746|274797|274845|274873
Gene000111	Isoform000244	-	2	2	1|1	274758|274849
Gene000111	Isoform000245	-	1	1	1	274779
Gene000111	Isoform000246	-	1	1	1	276546
Gene000112	Isoform000247	-	1	1	1	374722
Gene000113	Isoform000248	+	1	1	1	1388
Gene000114	Isoform000249	+	2	2	1|1	54108|54189
Gene000114	Isoform000250	+	1	1	1	55198
Gene000115	Isoform000251	+	4	3	1|2|1	59682|61554|61590
Gene000115	Isoform000252	+	5	5	1|1|1|1|1	60493|61357|61496|61512|61595
Gene000115	Isoform000253	+	1	1	1	61558
Gene000115	Isoform000254	+	1	1	1	60597
Gene000116	Isoform000255	+	3	3	1|1|1	92020|92095|92259
Gene000116	Isoform000256	+	1	1	1	91173
Gene000117	Isoform000257	+	2	2	1|1	121348|121402
Gene000117	Isoform000258	+	1	1	1	121349
Gene000118	Isoform000259	+	2	1	2	168598
Gene000119	Isoform000260	+	1	1	1	181908
Gene000120	Isoform000261	+	1	1	1	217156
Gene000121	Isoform000262	+	3	3	1|1|1	234434|234517|234519
Gene000122	Isoform000263	+	1	1	1	263268
Gene000122	Isoform000264	+	2	2	1|1	266004|266061
Gene000123	Isoform000265	+	1	1	1	312236
Gene000124	Isoform000266	+	2	2	1|1	338737|338758
Gene000124	Isoform000267	+	1	1	1	338719
Gene000125	Isoform000268	+	1	1	1	363086
Gene000126	Isoform000269	+	4	2	2|2	422379|422395
Gene000127	Isoform000270	+	1	1	1	476210
Gene000127	Isoform000271	+	1	1	1	478467
Gene000127	Isoform000272	+	1	1	1	478468
Gene000128	Isoform000273	+	1	1	1	502772
Gene000129	Isoform000274	+	1	1	1	534776
Gene000129	Isoform000275	+	3	3	1|1|1	534593|534647|534777
Gene000129	Isoform000276	+	1	1	1	534784
Gene000129	Isoform000277	+	1	1	1	533138
Gene000130	Isoform000278	+	1	1	1	543577
Gene000130	Isoform000279	+	11	10	1|1|1|2|1|1|1|1|1|1	546034|546324|546326|546354|546395|546400|546425|546426|546534|546539
Gene000130	Isoform000280	+	2	2	1|1	546365|546427
Gene000130	Isoform000281	+	1	1	1	546324
Gene000131	Isoform000282	+	1	1	1	551880
Gene000131	Isoform000283	+	2	2	1|1	551897|551959
Gene000132	Isoform000284	+	1	1	1	556872
Gene000133	Isoform000285	+	2	2	1|1	592727|592841
Gene000134	Isoform000286	+	22	11	1|1|1|1|8|3|1|2|1|2|1	819325|819328|819347|819371|819373|819374|819377|819378|819380|819381|819387
Gene000134	Isoform000287	+	1	1	1	819458
Gene000135	Isoform000288	+	12	12	1|1|1|1|1|1|1|1|1|1|1|1	845928|845930|845940|845946|846003|846021|846084|846111|846124|846165|846166|846283
Gene000135	Isoform000289	+	1	1	1	838717
Gene000135	Isoform000290	+	1	1	1	846138
Gene000136	Isoform000291	+	1	1	1	856027
Gene000137	Isoform000292	+	5	5	1|1|1|1|1	876945|876948|876979|877006|877140
Gene000137	Isoform000293	+	2	2	1|1	876195|876945
Gene000137	Isoform000294	+	1	1	1	877006
Gene000137	Isoform000295	+	2	2	1|1	876195|876951
Gene000137	Isoform000296	+	1	1	1	876989
Gene000137	Isoform000297	+	1	1	1	876962
Gene000137	Isoform000298	+	1	1	1	876944
Gene000138	Isoform000299	+	3	3	1|1|1	893586|893587|893800
Gene000139	Isoform000300	+	3	2	1|2	1043831|1044006
Gene000140	Isoform000301	-	1	1	1	41416
Gene000140	Isoform000302	-	1	1	1	41426
Gene000140	Isoform000303	-	1	1	1	41426
Gene000141	Isoform000304	-	1	1	1	67850
Gene000142	Isoform000305	-	1	1	1	72909
Gene000142	Isoform000306	-	3	3	1|1|1	72909|72917|73244
Gene000142	Isoform000307	-	1	1	1	72910
Gene000142	Isoform000308	-	1	1	1	72911
Gene000142	Isoform000309	-	1	1	1	72911
Gene000142	Isoform000310	-	1	1	1	72912
Gene000142	Isoform000311	-	1	1	1	72917
Gene000142	Isoform000312	-	1	1	1	72921
Gene000143	Isoform000313	-	2	2	1|1	121902|122054
Gene000143	Isoform000314	-	1	1	1	121975
Gene000144	Isoform000315	-	1	1	1	134338
Gene000145	Isoform000316	-	2	2	1|1	183831|183970
Gene000145	Isoform000317	-	1	1	1	192114
Gene000146	Isoform000318	-	1	1	1	246668
Gene000146	Isoform000319	-	1	1	1	247613
Gene000147	Isoform000320	-	2	2	1|1	270724|270831
Gene000148	Isoform000321	-	1	1	1	321213
Gene000149	Isoform000322	-	1	1	1	340694
Gene000150	Isoform000323	-	3	3	1|1|1	372503|372563|372617
Gene000150	Isoform000324	-	1	1	1	372506
Gene000150	Isoform000325	-	1	1	1	372546
Gene000151	Isoform000326	-	1	1	1	388843
Gene000151	Isoform000327	-	1	1	1	388843
Gene000152	Isoform000328	-	1	1	1	409035
Gene000152	Isoform000329	-	1	1	1	409696
Gene000153	Isoform000330	-	1	1	1	413573
Gene000154	Isoform000331	-	2	2	1|1	434144|434199
Gene000155	Isoform000332	-	2	2	1|1	456219|456367
Gene000156	Isoform000333	-	1	1	1	523134
Gene000157	Isoform000334	-	3	3	1|1|1	557872|558042|558107
Gene000157	Isoform000335	-	1	1	1	557990
Gene000158	Isoform000336	-	1	1	1	561583
Gene000158	Isoform000337	-	1	1	1	564790
Gene000158	Isoform000338	-	1	1	1	564837
Gene000159	Isoform000339	-	1	1	1	572814
Gene000159	Isoform000340	-	1	1	1	572817
Gene000160	Isoform000341	-	1	1	1	577441
Gene000160	Isoform000342	-	1	1	1	578198
Gene000161	Isoform000343	-	2	2	1|1	638671|639240
Gene000161	Isoform000344	-	1	1	1	640181
Gene000162	Isoform000345	-	1	1	1	789765
Gene000163	Isoform000346	-	1	1	1	806057
Gene000163	Isoform000347	-	2	2	1|1	806126|806421
Gene000163	Isoform000348	-	1	1	1	806338
Gene000163	Isoform000349	-	1	1	1	806448
Gene000164	Isoform000350	-	1	1	1	820360
Gene000164	Isoform000351	-	1	1	1	820385
Gene000165	Isoform000352	-	1	1	1	823718
Gene000165	Isoform000353	-	1	1	1	823736
Gene000166	Isoform000354	-	5	4	1|2|1|1	827151|827228|827287|827303
Gene000166	Isoform000355	-	1	1	1	827187
Gene000166	Isoform000356	-	1	1	1	827234
Gene000166	Isoform000357	-	1	1	1	827277
Gene000167	Isoform000358	-	2	2	1|1	863086|863088
Gene000168	Isoform000359	-	1	1	1	900427
Gene000169	Isoform000360	-	3	3	1|1|1	916585|916661|916722
Gene000170	Isoform000361	-	1	1	1	923633
Gene000171	Isoform000362	-	1	1	1	1008584
Gene000172	Isoform000363	+	1	1	1	180325
Gene000172	Isoform000364	+	1	1	1	198441
Gene000173	Isoform000365	+	1	1	1	258761
Gene000174	Isoform000366	+	1	1	1	313226
Gene000175	Isoform000367	+	1	1	1	544527
Gene000175	Isoform000368	+	1	1	1	542741
Gene000176	Isoform000369	+	3	3	1|1|1	660978|661006|661057
Gene000177	Isoform000370	+	1	1	1	691512
Gene000178	Isoform000371	+	1	1	1	752367
Gene000179	Isoform000372	+	1	1	1	767798
Gene000179	Isoform000373	+	1	1	1	767997
Gene000179	Isoform000374	+	1	1	1	767920
Gene000180	Isoform000375	+	5	4	1|2|1|1	790242|790243|790244|790374
Gene000180	Isoform000376	+	1	1	1	790201
Gene000181	Isoform000377	+	4	4	1|1|1|1	806669|806730|806914|806916
Gene000181	Isoform000378	+	1	1	1	806859
Gene000181	Isoform000379	+	1	1	1	806739
Gene000181	Isoform000380	+	2	2	1|1	806670|806707
Gene000181	Isoform000381	+	1	1	1	806731
Gene000182	Isoform000382	+	3	3	1|1|1	821048|821120|821174
Gene000182	Isoform000383	+	1	1	1	821083
Gene000183	Isoform000384	+	1	1	1	849303
Gene000184	Isoform000385	+	3	3	1|1|1	854768|854864|855183
Gene000184	Isoform000386	+	1	1	1	854778
Gene000184	Isoform000387	+	1	1	1	854863
Gene000185	Isoform000388	+	1	1	1	863722
Gene000186	Isoform000389	+	2	2	1|1	885483|885515
Gene000187	Isoform000390	+	2	2	1|1	1098383|1098391
Gene000188	Isoform000391	+	1	1	1	1106114
Gene000189	Isoform000392	+	5	5	1|1|1|1|1	1160510|1160530|1160545|1160555|1160686
Gene000190	Isoform000393	+	9	8	1|1|1|1|1|2|1|1	1264675|1264677|1264681|1264706|1264737|1264739|1264740|1264777
Gene000191	Isoform000394	-	7	6	1|1|1|1|2|1	133345|133360|133365|133366|133372|133373
Gene000191	Isoform000395	-	1	1	1	133372
Gene000192	Isoform000396	-	1	1	1	215729
Gene000193	Isoform000397	-	1	1	1	355856
Gene000193	Isoform000398	-	2	2	1|1	355896|355949
Gene000193	Isoform000399	-	1	1	1	355903
Gene000193	Isoform000400	-	1	1	1	372510
Gene000193	Isoform000401	-	1	1	1	372537
Gene000193	Isoform000402	-	1	1	1	378228
Gene000194	Isoform000403	-	3	3	1|1|1	630593|630632|630633
Gene000194	Isoform000404	-	1	1	1	630626
Gene000195	Isoform000405	-	1	1	1	692031
Gene000196	Isoform000406	-	4	4	1|1|1|1	713823|713908|713963|713991
Gene000196	Isoform000407	-	1	1	1	713962
Gene000196	Isoform000408	-	2	2	1|1	713964|714957
Gene000196	Isoform000409	-	1	1	1	713966
Gene000196	Isoform000410	-	1	1	1	713966
Gene000197	Isoform000411	-	2	2	1|1	768839|768939
Gene000197	Isoform000412	-	1	1	1	772937
Gene000198	Isoform000413	-	1	1	1	793088
Gene000199	Isoform000414	-	1	1	1	795841
Gene000200	Isoform000415	-	1	1	1	945576
Gene000201	Isoform000416	-	1	1	1	968681
Gene000201	Isoform000417	-	1	1	1	968748
Gene000201	Isoform000418	-	2	2	1|1	968773|968971
Gene000201	Isoform000419	-	1	1	1	968904
Gene000201	Isoform000420	-	1	1	1	968968
Gene000201	Isoform000421	-	1	1	1	971270
Gene000201	Isoform000422	-	1	1	1	977917
Gene000202	Isoform000423	-	2	2	1|1	994873|994960
Gene000203	Isoform000424	-	1	1	1	1004050
Gene000204	Isoform000425	-	1	1	1	1010358
Gene000204	Isoform000426	-	1	1	1	1010450
Gene000204	Isoform000427	-	1	1	1	1010451
Gene000204	Isoform000428	-	1	1	1	1043804
Gene000204	Isoform000429	-	1	1	1	1043804
Gene000204	Isoform000430	-	1	1	1	1043808
Gene000204	Isoform000431	-	1	1	1	1043882
Gene000205	Isoform000432	-	1	1	1	1047176
Gene000206	Isoform000433	-	1	1	1	1072384
Gene000206	Isoform000434	-	3	3	1|1|1	1072691|1072799|1072875
Gene000207	Isoform000435	-	1	1	1	1108967
Gene000208	Isoform000436	-	1	1	1	1151466
Gene000209	Isoform000437	-	1	1	1	1234349
Gene000210	Isoform000438	+	3	3	1|1|1	63189|63190|63307
Gene000211	Isoform000439	+	1	1	1	151416
Gene000211	Isoform000440	+	1	1	1	151417
Gene000212	Isoform000441	+	3	3	1|1|1	158494|158555|158568
Gene000213	Isoform000442	+	1	1	1	200507
Gene000213	Isoform000443	+	1	1	1	200542
Gene000214	Isoform000444	+	2	2	1|1	216246|216297
Gene000215	Isoform000445	+	87	33	1|1|4|5|6|2|1|1|1|1|1|4|2|4|3|1|1|1|1|1|3|11|16|2|2|1|1|3|1|1|2|1|1	246661|246666|246667|246669|246671|246672|246679|246680|246681|246684|246685|246686|246687|246688|246689|246700|246740|246892|246899|246901|246921|246923|246924|246925|246926|246938|246948|246949|246950|246954|246962|246981|247726
Gene000215	Isoform000446	+	1	1	1	246688
Gene000215	Isoform000447	+	5	5	1|1|1|1|1	246669|246688|246699|246901|246949
Gene000215	Isoform000448	+	1	1	1	246688
Gene000215	Isoform000449	+	2	2	1|1	246668|246924
Gene000215	Isoform000450	+	3	3	1|1|1	246661|246688|246923
Gene000215	Isoform000451	+	5	5	1|1|1|1|1	246667|246668|246924|246949|247016
Gene000216	Isoform000452	+	1	1	1	262685
Gene000217	Isoform000453	+	2	2	1|1	308428|308524
Gene000218	Isoform000454	+	1	1	1	313665
Gene000218	Isoform000455	+	1	1	1	313587
Gene000219	Isoform000456	+	12	8	1|3|2|1|1|2|1|1	346350|346351|346352|346354|346356|346357|346358|346368
Gene000219	Isoform000457	+	3	2	1|2	346351|346356
Gene000220	Isoform000458	+	1	1	1	352915
Gene000221	Isoform000459	+	1	1	1	359304
Gene000222	Isoform000460	+	1	1	1	372577
Gene000222	Isoform000461	+	1	1	1	372578
Gene000223	Isoform000462	+	3	3	1|1|1	493704|493767|494687
Gene000224	Isoform000463	+	3	3	1|1|1	511550|511598|511690
Gene000224	Isoform000464	+	1	1	1	511598
Gene000225	Isoform000465	+	1	1	1	521418
Gene000226	Isoform000466	+	1	1	1	531303
Gene000227	Isoform000467	+	2	2	1|1	537662|537742
Gene000227	Isoform000468	+	3	3	1|1|1	537631|537664|537666
Gene000228	Isoform000469	+	1	1	1	552552
Gene000229	Isoform000470	+	1	1	1	615889
Gene000230	Isoform000471	+	1	1	1	651064
Gene000230	Isoform000472	+	1	1	1	651089
Gene000230	Isoform000473	+	1	1	1	651065
Gene000231	Isoform000474	+	1	1	1	654360
Gene000232	Isoform000475	+	2	2	1|1	668068|668156
Gene000232	Isoform000476	+	1	1	1	666262
Gene000232	Isoform000477	+	1	1	1	668132
Gene000233	Isoform000478	+	1	1	1	690639
Gene000234	Isoform000479	+	2	2	1|1	703730|703796
Gene000234	Isoform000480	+	2	2	1|1	703773|703854
Gene000235	Isoform000481	+	1	1	1	735956
Gene000236	Isoform000482	+	1	1	1	758850
Gene000237	Isoform000483	+	1	1	1	799340
Gene000237	Isoform000484	+	7	6	1|1|2|1|1|1	799080|799196|799197|799249|799306|799372
Gene000238	Isoform000485	+	1	1	1	810662
Gene000239	Isoform000486	+	2	2	1|1	827160|827436
Gene000239	Isoform000487	+	3	3	1|1|1	825459|825515|825612
Gene000240	Isoform000488	+	1	1	1	836766
Gene000240	Isoform000489	+	1	1	1	834595
Gene000241	Isoform000490	+	3	3	1|1|1	872175|872290|872294
Gene000242	Isoform000491	-	3	3	1|1|1	19914|19917|19991
Gene000243	Isoform000492	-	1	1	1	42900
Gene000244	Isoform000493	-	1	1	1	139874
Gene000245	Isoform000494	-	1	1	1	164762
Gene000246	Isoform000495	-	5	5	1|1|1|1|1	173178|173233|173234|173255|173257
Gene000247	Isoform000496	-	3	3	1|1|1	183082|183143|183207
Gene000248	Isoform000497	-	1	1	1	203809
Gene000249	Isoform000498	-	1	1	1	228302
Gene000249	Isoform000499	-	2	2	1|1	228386|228450
Gene000249	Isoform000500	-	1	1	1	229620
Gene000250	Isoform000501	-	1	1	1	263927
Gene000250	Isoform000502	-	1	1	1	263952
Gene000251	Isoform000503	-	1	1	1	273546
Gene000252	Isoform000504	-	1	1	1	314364
Gene000253	Isoform000505	-	2	2	1|1	330754|330979
Gene000253	Isoform000506	-	1	1	1	330755
Gene000253	Isoform000507	-	1	1	1	330954
Gene000253	Isoform000508	-	1	1	1	330979
Gene000253	Isoform000509	-	1	1	1	330979
Gene000253	Isoform000510	-	1	1	1	333131
Gene000254	Isoform000511	-	1	1	1	381850
Gene000254	Isoform000512	-	2	2	1|1	381850|381977
Gene000255	Isoform000513	-	1	1	1	396329
Gene000256	Isoform000514	-	1	1	1	398688
Gene000257	Isoform000515	-	4	4	1|1|1|1	413244|413254|413355|413417
Gene000258	Isoform000516	-	1	1	1	492079
Gene000259	Isoform000517	-	1	1	1	521893
Gene000260	Isoform000518	-	1	1	1	638631
Gene000261	Isoform000519	-	1	1	1	669316
Gene000262	Isoform000520	-	1	1	1	690103
Gene000262	Isoform000521	-	1	1	1	691148
Gene000262	Isoform000522	-	1	1	1	691206
Gene000262	Isoform000523	-	1	1	1	692023
Gene000263	Isoform000524	-	3	2	1|2	704516|704527
Gene000263	Isoform000525	-	1	1	1	704527
Gene000263	Isoform000526	-	1	1	1	709698
Gene000263	Isoform000527	-	1	1	1	709698
Gene000263	Isoform000528	-	1	1	1	714264
Gene000264	Isoform000529	-	1	1	1	725290
Gene000264	Isoform000530	-	1	1	1	726457
Gene000265	Isoform000531	-	1	1	1	772084
Gene000265	Isoform000532	-	1	1	1	774017
Gene000266	Isoform000533	-	2	2	1|1	810631|810734
Gene000267	Isoform000534	-	2	2	1|1	825785|825791
Gene000267	Isoform000535	-	2	1	2	825790
Gene000267	Isoform000536	-	1	1	1	825827
Gene000268	Isoform000537	-	3	3	1|1|1	888038|888129|888159
Gene000269	Isoform000538	+	2	2	1|1	39145|39263
Gene000270	Isoform000539	+	10	9	1|2|1|1|1|1|1|1|1	65844|65987|65992|66054|66058|66312|66900|67680|67846
Gene000270	Isoform000540	+	2	2	1|1	67540|67606
Gene000271	Isoform000541	+	1	1	1	89825
Gene000272	Isoform000542	+	1	1	1	109282
Gene000272	Isoform000543	+	1	1	1	109409
Gene000272	Isoform000544	+	1	1	1	109283
Gene000273	Isoform000545	+	1	1	1	141623
Gene000273	Isoform000546	+	1	1	1	144407
Gene000274	Isoform000547	+	1	1	1	192126
Gene000274	Isoform000548	+	1	1	1	192126
Gene000275	Isoform000549	+	1	1	1	308529
Gene000275	Isoform000550	+	1	1	1	308513
Gene000276	Isoform000551	+	1	1	1	404437
Gene000277	Isoform000552	+	1	1	1	429887
Gene000278	Isoform000553	+	1	1	1	684715
Gene000278	Isoform000554	+	1	1	1	671679
Gene000278	Isoform000555	+	1	1	1	684610
Gene000278	Isoform000556	+	1	1	1	684608
Gene000279	Isoform000557	+	3	3	1|1|1	722454|722516|722811
Gene000279	Isoform000558	+	1	1	1	723631
Gene000279	Isoform000559	+	1	1	1	723821
Gene000280	Isoform000560	-	1	1	1	1275
Gene000280	Isoform000561	-	1	1	1	1285
Gene000280	Isoform000562	-	2	2	1|1	1334|1343
Gene000280	Isoform000563	-	2	2	1|1	1341|1343
Gene000281	Isoform000564	-	3	3	1|1|1	40751|41341|41399
Gene000281	Isoform000565	-	1	1	1	40858
Gene000282	Isoform000566	-	2	2	1|1	125346|125413
Gene000283	Isoform000567	-	2	2	1|1	208936|209042
Gene000283	Isoform000568	-	1	1	1	209042
Gene000284	Isoform000569	-	2	2	1|1	273098|273100
Gene000285	Isoform000570	-	1	1	1	279672
Gene000286	Isoform000571	-	2	2	1|1	334569|334671
Gene000286	Isoform000572	-	1	1	1	334584
Gene000286	Isoform000573	-	1	1	1	334652
Gene000287	Isoform000574	-	2	2	1|1	373397|373479
Gene000287	Isoform000575	-	2	2	1|1	373423|373480
Gene000287	Isoform000576	-	1	1	1	373496
Gene000287	Isoform000577	-	1	1	1	377648
Gene000288	Isoform000578	-	1	1	1	464321
Gene000289	Isoform000579	+	1	1	1	237322
Gene000290	Isoform000580	+	1	1	1	378068
Gene000291	Isoform000581	+	1	1	1	594581
Gene000292	Isoform000582	+	1	1	1	677130
Gene000293	Isoform000583	+	1	1	1	727155
Gene000294	Isoform000584	+	1	1	1	798118
Gene000295	Isoform000585	-	1	1	1	154247
Gene000296	Isoform000586	-	3	3	1|1|1	269491|269492|269678
Gene000297	Isoform000587	-	1	1	1	429018
Gene000297	Isoform000588	-	1	1	1	429034
Gene000298	Isoform000589	-	1	1	1	508999
Gene000299	Isoform000590	-	2	2	1|1	722506|722613
Gene000299	Isoform000591	-	6	6	1|1|1|1|1|1	722506|722508|722522|722523|722525|722530
Gene000300	Isoform000592	+	1	1	1	145396
Gene000301	Isoform000593	+	3	3	1|1|1	294587|294655|294756
Gene000301	Isoform000594	+	2	2	1|1	294655|294707
Gene000301	Isoform000595	+	1	1	1	302891
Gene000301	Isoform000596	+	1	1	1	295712
Gene000302	Isoform000597	+	1	1	1	326871
Gene000302	Isoform000598	+	1	1	1	326669
Gene000302	Isoform000599	+	1	1	1	326855
Gene000303	Isoform000600	+	1	1	1	366946
Gene000303	Isoform000601	+	1	1	1	366477
Gene000304	Isoform000602	+	3	3	1|1|1	421249|421263|421318
Gene000304	Isoform000603	+	2	2	1|1	421263|421365
Gene000305	Isoform000604	+	1	1	1	445211
Gene000305	Isoform000605	+	2	2	1|1	446857|447005
Gene000306	Isoform000606	+	6	3	2|3|1	486336|486337|486342
Gene000306	Isoform000607	+	6	2	1|5	486169|486336
Gene000306	Isoform000608	+	3	2	2|1	486337|486339
Gene000306	Isoform000609	+	1	1	1	486336
Gene000306	Isoform000610	+	1	1	1	486336
Gene000306	Isoform000611	+	1	1	1	486337
Gene000306	Isoform000612	+	1	1	1	486337
Gene000307	Isoform000613	+	2	2	1|1	509852|510030
Gene000308	Isoform000614	+	1	1	1	524323
Gene000309	Isoform000615	+	2	1	2	538771
Gene000309	Isoform000616	+	1	1	1	538867
Gene000309	Isoform000617	+	1	1	1	538771
Gene000310	Isoform000618	+	1	1	1	645609
Gene000311	Isoform000619	+	1	1	1	692947
Gene000312	Isoform000620	+	1	1	1	704716
Gene000313	Isoform000621	+	1	1	1	713417
Gene000313	Isoform000622	+	1	1	1	713407
Gene000314	Isoform000623	+	4	4	1|1|1|1	730925|730926|730930|730938
Gene000315	Isoform000624	+	3	3	1|1|1	739985|740061|740197
Gene000316	Isoform000625	+	3	2	2|1	754513|754566
Gene000316	Isoform000626	+	1	1	1	754524
Gene000316	Isoform000627	+	7	6	2|1|1|1|1|1	754225|754306|754386|754436|754513|754524
Gene000316	Isoform000628	+	1	1	1	754516
Gene000316	Isoform000629	+	1	1	1	754515
Gene000316	Isoform000630	+	1	1	1	754230
Gene000317	Isoform000631	+	1	1	1	797946
Gene000318	Isoform000632	+	1	1	1	836498
Gene000319	Isoform000633	+	1	1	1	873774
Gene000320	Isoform000634	+	1	1	1	880406
Gene000321	Isoform000635	-	1	1	1	324823
Gene000321	Isoform000636	-	1	1	1	325000
Gene000322	Isoform000637	-	23	13	2|1|1|1|2|2|2|1|1|3|4|1|2	366934|367008|367035|367043|367044|367045|367046|367048|367061|367062|367063|367064|367068
Gene000322	Isoform000638	-	1	1	1	367041
Gene000322	Isoform000639	-	1	1	1	367043
Gene000322	Isoform000640	-	1	1	1	367048
Gene000322	Isoform000641	-	1	1	1	367052
Gene000322	Isoform000642	-	2	2	1|1	367063|367099
Gene000323	Isoform000643	-	1	1	1	410934
Gene000324	Isoform000644	-	2	2	1|1	488581|488600
Gene000325	Isoform000645	-	1	1	1	531050
Gene000326	Isoform000646	-	1	1	1	579349
Gene000327	Isoform000647	-	1	1	1	604872
Gene000328	Isoform000648	-	1	1	1	617112
Gene000328	Isoform000649	-	1	1	1	617114
Gene000329	Isoform000650	-	4	4	1|1|1|1	673588|673593|673620|673653
Gene000330	Isoform000651	-	1	1	1	798772
Gene000330	Isoform000652	-	2	2	1|1	798778|798880
Gene000330	Isoform000653	-	4	3	1|2|1	798817|798819|798880
Gene000330	Isoform000654	-	1	1	1	801294
Gene000331	Isoform000655	-	4	3	1|1|2	805631|805709|805710
Gene000331	Isoform000656	-	1	1	1	805668
Gene000331	Isoform000657	-	1	1	1	805699
Gene000331	Isoform000658	-	1	1	1	805709
Gene000331	Isoform000659	-	1	1	1	805709
Gene000331	Isoform000660	-	1	1	1	805710
Gene000331	Isoform000661	-	1	1	1	805710
Gene000331	Isoform000662	-	1	1	1	805735
Gene000332	Isoform000663	-	2	2	1|1	820751|820797
Gene000333	Isoform000664	-	1	1	1	23019
Gene000334	Isoform000665	+	1	1	1	11008
Gene000335	Isoform000666	+	1	1	1	14816
Gene000336	Isoform000667	+	4	4	1|1|1|1	33804|33882|33904|33995
Gene000336	Isoform000668	+	1	1	1	33783
Gene000336	Isoform000669	+	1	1	1	33911
Gene000336	Isoform000670	+	1	1	1	33775
Gene000337	Isoform000671	+	2	2	1|1	50844|50984
Gene000338	Isoform000672	+	3	3	1|1|1	60935|60988|61001
Gene000339	Isoform000673	+	1	1	1	81526
Gene000340	Isoform000674	+	1	1	1	89396
Gene000341	Isoform000675	+	1	1	1	92699
Gene000341	Isoform000676	+	4	3	2|1|1	92700|92702|92705
Gene000341	Isoform000677	+	1	1	1	92607
Gene000342	Isoform000678	+	1	1	1	99135
Gene000343	Isoform000679	+	2	2	1|1	104161|104204
Gene000343	Isoform000680	+	1	1	1	104359
Gene000344	Isoform000681	+	3	3	1|1|1	160280|160365|160434
Gene000345	Isoform000682	+	3	3	1|1|1	216565|216782|216841
Gene000345	Isoform000683	+	1	1	1	216802
Gene000346	Isoform000684	+	1	1	1	222263
Gene000346	Isoform000685	+	1	1	1	222262
Gene000346	Isoform000686	+	1	1	1	219848
Gene000346	Isoform000687	+	1	1	1	222309
Gene000347	Isoform000688	+	3	3	1|1|1	226313|226413|228355
Gene000348	Isoform000689	+	3	3	1|1|1	519948|520060|520243
Gene000348	Isoform000690	+	1	1	1	520059
Gene000348	Isoform000691	+	1	1	1	520059
Gene000349	Isoform000692	+	1	1	1	527092
Gene000350	Isoform000693	+	1	1	1	579116
Gene000351	Isoform000694	+	1	1	1	613174
Gene000352	Isoform000695	+	1	1	1	628856
Gene000352	Isoform000696	+	1	1	1	639470
Gene000352	Isoform000697	+	1	1	1	628850
Gene000352	Isoform000698	+	4	4	1|1|1|1	639307|639441|639477|639482
Gene000352	Isoform000699	+	1	1	1	635313
Gene000352	Isoform000700	+	1	1	1	639441
Gene000352	Isoform000701	+	1	1	1	639389
Gene000353	Isoform000702	+	2	2	1|1	646057|646160
Gene000354	Isoform000703	-	1	1	1	37241
Gene000355	Isoform000704	-	1	1	1	62434
Gene000355	Isoform000705	-	2	2	1|1	62797|62940
Gene000356	Isoform000706	-	1	1	1	70640
Gene000357	Isoform000707	-	1	1	1	111986
Gene000358	Isoform000708	-	1	1	1	117783
Gene000359	Isoform000709	-	1	1	1	131388
Gene000360	Isoform000710	-	1	1	1	158635
Gene000361	Isoform000711	-	1	1	1	201388
Gene000362	Isoform000712	-	1	1	1	245985
Gene000363	Isoform000713	-	1	1	1	250915
Gene000364	Isoform000714	-	1	1	1	538663
Gene000364	Isoform000715	-	1	1	1	538663
Gene000364	Isoform000716	-	1	1	1	538664
Gene000364	Isoform000717	-	2	2	1|1	538700|538777
Gene000364	Isoform000718	-	1	1	1	538725
Gene000365	Isoform000719	-	1	1	1	555486
Gene000365	Isoform000720	-	1	1	1	555486
Gene000365	Isoform000721	-	1	1	1	555486
Gene000366	Isoform000722	-	1	1	1	560025
Gene000367	Isoform000723	+	1	1	1	268392
Gene000368	Isoform000724	+	1	1	1	318836
Gene000368	Isoform000725	+	1	1	1	319252
Gene000368	Isoform000726	+	1	1	1	318941
Gene000368	Isoform000727	+	1	1	1	318875
Gene000369	Isoform000728	+	1	1	1	511086
Gene000369	Isoform000729	+	4	4	1|1|1|1	444902|445083|445087|445366
Gene000369	Isoform000730	+	1	1	1	447649
Gene000369	Isoform000731	+	1	1	1	456833
Gene000369	Isoform000732	+	1	1	1	511125
Gene000369	Isoform000733	+	1	1	1	503126
Gene000370	Isoform000734	+	1	1	1	576554
Gene000371	Isoform000735	+	1	1	1	668011
Gene000371	Isoform000736	+	1	1	1	668079
Gene000371	Isoform000737	+	1	1	1	668161
Gene000372	Isoform000738	+	1	1	1	693927
Gene000372	Isoform000739	+	1	1	1	693960
Gene000372	Isoform000740	+	1	1	1	693939
Gene000372	Isoform000741	+	1	1	1	693805
Gene000373	Isoform000742	+	1	1	1	747458
Gene000373	Isoform000743	+	1	1	1	747348
Gene000373	Isoform000744	+	1	1	1	747373
Gene000374	Isoform000745	+	1	1	1	790403
Gene000374	Isoform000746	+	2	2	1|1	787079|787213
Gene000374	Isoform000747	+	1	1	1	790314
Gene000374	Isoform000748	+	1	1	1	790425
Gene000374	Isoform000749	+	4	4	1|1|1|1	790243|790307|790416|790439
Gene000375	Isoform000750	+	1	1	1	794877
Gene000376	Isoform000751	+	2	2	1|1	814523|814584
Gene000376	Isoform000752	+	2	2	1|1	814606|814679
Gene000376	Isoform000753	+	1	1	1	814679
Gene000376	Isoform000754	+	1	1	1	814589
Gene000377	Isoform000755	-	1	1	1	299424
Gene000377	Isoform000756	-	1	1	1	299424
Gene000377	Isoform000757	-	1	1	1	299425
Gene000378	Isoform000758	-	1	1	1	319969
Gene000379	Isoform000759	-	1	1	1	331304
Gene000380	Isoform000760	-	1	1	1	339146
Gene000380	Isoform000761	-	1	1	1	339163
Gene000381	Isoform000762	-	3	3	1|1|1	353296|353392|353462
Gene000381	Isoform000763	-	1	1	1	353348
Gene000382	Isoform000764	-	1	1	1	388757
Gene000383	Isoform000765	-	1	1	1	502888
Gene000383	Isoform000766	-	2	2	1|1	513187|514905
Gene000383	Isoform000767	-	2	2	1|1	534333|534419
Gene000383	Isoform000768	-	1	1	1	537443
Gene000384	Isoform000769	-	1	1	1	571451
Gene000385	Isoform000770	-	1	1	1	630889
Gene000386	Isoform000771	-	3	3	1|1|1	653524|653545|653614
Gene000387	Isoform000772	-	2	2	1|1	659973|660005
Gene000388	Isoform000773	-	1	1	1	728805
Gene000388	Isoform000774	-	2	2	1|1	728829|729228
Gene000389	Isoform000775	-	1	1	1	795109
Gene000389	Isoform000776	-	8	5	2|3|1|1|1	795121|795123|795126|795187|795252
Gene000389	Isoform000777	-	1	1	1	795144
Gene000390	Isoform000778	-	1	1	1	814870
Gene000391	Isoform000779	-	1	1	1	815203
Gene000392	Isoform000780	-	14	7	1|1|1|1|8|1|1	818852|818860|818898|818902|818908|818916|819011
Gene000393	Isoform000781	-	1	1	1	828912
Gene000394	Isoform000782	+	1	1	1	37329
Gene000394	Isoform000783	+	1	1	1	32208
Gene000394	Isoform000784	+	27	14	1|1|2|3|1|1|1|9|2|2|1|1|1|1	37223|37316|37320|37324|37329|37330|37332|37334|37335|37336|37372|37380|37458|37462
Gene000395	Isoform000785	+	1	1	1	64271
Gene000395	Isoform000786	+	2	2	1|1	64073|64167
Gene000396	Isoform000787	+	1	1	1	112585
Gene000397	Isoform000788	+	1	1	1	125403
Gene000398	Isoform000789	+	1	1	1	136780
Gene000398	Isoform000790	+	1	1	1	136807
Gene000398	Isoform000791	+	1	1	1	136781
Gene000399	Isoform000792	+	1	1	1	141709
Gene000400	Isoform000793	+	2	2	1|1	147467|147684
Gene000401	Isoform000794	+	2	2	1|1	196228|196293
Gene000402	Isoform000795	+	1	1	1	296704
Gene000402	Isoform000796	+	1	1	1	296811
Gene000403	Isoform000797	+	2	2	1|1	313871|313880
Gene000403	Isoform000798	+	2	2	1|1	313869|313870
Gene000404	Isoform000799	+	2	2	1|1	441427|441627
Gene000405	Isoform000800	+	1	1	1	614200
Gene000406	Isoform000801	-	107	30	1|1|1|1|3|12|3|1|1|1|1|1|1|2|1|5|15|8|4|1|8|18|7|3|1|1|2|1|1|1	65046|65071|65087|65102|65103|65104|65105|65106|65139|65160|65167|65169|65207|65211|65227|65229|65230|65231|65232|65243|65246|65248|65249|65250|65252|65261|65270|65272|65299|65457
Gene000406	Isoform000802	-	2	2	1|1	65104|65230
Gene000407	Isoform000803	-	1	1	1	114322
Gene000408	Isoform000804	-	4	4	1|1|1|1	154767|154842|154913|155017
Gene000408	Isoform000805	-	3	3	1|1|1	154938|156100|156174
Gene000408	Isoform000806	-	1	1	1	156073
Gene000409	Isoform000807	-	2	2	1|1	160968|161186
Gene000410	Isoform000808	-	1	1	1	188132
Gene000411	Isoform000809	-	1	1	1	205809
Gene000412	Isoform000810	-	1	1	1	284938
Gene000413	Isoform000811	-	1	1	1	322672
Gene000414	Isoform000812	-	1	1	1	334343
Gene000415	Isoform000813	-	1	1	1	446963
Gene000416	Isoform000814	-	1	1	1	460854
Gene000416	Isoform000815	-	1	1	1	461234
Gene000417	Isoform000816	-	3	2	2|1	499133|499134
Gene000418	Isoform000817	-	2	2	1|1	524659|524731
Gene000419	Isoform000818	-	1	1	1	530035
Gene000419	Isoform000819	-	1	1	1	530124
Gene000420	Isoform000820	-	1	1	1	564930
Gene000420	Isoform000821	-	1	1	1	565019
Gene000420	Isoform000822	-	1	1	1	565054
Gene000421	Isoform000823	+	1	1	1	52975
Gene000422	Isoform000824	+	1	1	1	114482
Gene000423	Isoform000825	+	1	1	1	151823
Gene000424	Isoform000826	+	5	5	1|1|1|1|1	156066|156068|156124|156192|156280
Gene000424	Isoform000827	+	1	1	1	156296
Gene000425	Isoform000828	+	1	1	1	197478
Gene000425	Isoform000829	+	1	1	1	200104
Gene000426	Isoform000830	+	1	1	1	214012
Gene000426	Isoform000831	+	1	1	1	214009
Gene000427	Isoform000832	+	1	1	1	399774
Gene000428	Isoform000833	+	1	1	1	552942
Gene000428	Isoform000834	+	1	1	1	552967
Gene000429	Isoform000835	-	3	3	1|1|1	395516|395519|395621
Gene000430	Isoform000836	-	2	2	1|1	417715|417813
Gene000430	Isoform000837	-	3	3	1|1|1	417715|417813|417814
Gene000431	Isoform000838	-	8	6	1|1|3|1|1|1	468520|468578|468632|468646|468650|468651
Gene000431	Isoform000839	-	3	3	1|1|1	468561|468632|470690
Gene000432	Isoform000840	-	1	1	1	497576
Gene000433	Isoform000841	-	1	1	1	534697
Gene000434	Isoform000842	-	3	3	1|1|1	553897|553944|553966
Gene000434	Isoform000843	-	1	1	1	559095
Gene000435	Isoform000844	-	1	1	1	580879
Gene000436	Isoform000845	-	2	2	1|1	612132|612211
Gene000436	Isoform000846	-	1	1	1	612200
Gene000436	Isoform000847	-	1	1	1	612201
Gene000436	Isoform000848	-	1	1	1	612207
Gene000436	Isoform000849	-	1	1	1	612210
Gene000436	Isoform000850	-	1	1	1	615767
Gene000437	Isoform000851	+	2	2	1|1	36375|36394
Gene000437	Isoform000852	+	1	1	1	36322
Gene000437	Isoform000853	+	1	1	1	36395
Gene000438	Isoform000854	+	1	1	1	105569
Gene000439	Isoform000855	+	1	1	1	111122
Gene000439	Isoform000856	+	1	1	1	109805
Gene000439	Isoform000857	+	1	1	1	111122
Gene000440	Isoform000858	+	2	2	1|1	118110|118111
Gene000440	Isoform000859	+	1	1	1	118116
Gene000441	Isoform000860	+	3	3	1|1|1	262638|262660|262665
Gene000442	Isoform000861	+	1	1	1	318155
Gene000442	Isoform000862	+	1	1	1	318158
Gene000442	Isoform000863	+	2	2	1|1	318091|318159
Gene000443	Isoform000864	+	1	1	1	328733
Gene000444	Isoform000865	+	5	5	1|1|1|1|1	500684|500696|500711|500785|500822
Gene000444	Isoform000866	+	1	1	1	500685
Gene000444	Isoform000867	+	3	3	1|1|1	500614|500683|500684
Gene000444	Isoform000868	+	1	1	1	500684
Gene000444	Isoform000869	+	1	1	1	500683
Gene000445	Isoform000870	+	1	1	1	583577
Gene000445	Isoform000871	+	1	1	1	583798
Gene000445	Isoform000872	+	1	1	1	583848
Gene000446	Isoform000873	+	1	1	1	595376
Gene000447	Isoform000874	+	1	1	1	756404
Gene000447	Isoform000875	+	1	1	1	756464
Gene000447	Isoform000876	+	1	1	1	754844
Gene000447	Isoform000877	+	3	3	1|1|1	756533|756534|756614
Gene000447	Isoform000878	+	6	6	1|1|1|1|1|1	756424|756487|756507|756511|756536|756695
Gene000447	Isoform000879	+	1	1	1	756403
Gene000447	Isoform000880	+	1	1	1	756510
Gene000447	Isoform000881	+	1	1	1	754844
Gene000447	Isoform000882	+	1	1	1	756536
Gene000447	Isoform000883	+	1	1	1	756558
Gene000447	Isoform000884	+	1	1	1	756612
Gene000448	Isoform000885	+	1	1	1	781875
Gene000449	Isoform000886	+	2	2	1|1	794116|794189
Gene000450	Isoform000887	+	1	1	1	815135
Gene000451	Isoform000888	+	1	1	1	827517
Gene000452	Isoform000889	+	1	1	1	936883
Gene000452	Isoform000890	+	1	1	1	936977
Gene000453	Isoform000891	+	1	1	1	995644
Gene000453	Isoform000892	+	1	1	1	995634
Gene000454	Isoform000893	+	6	6	1|1|1|1|1|1	1043637|1043791|1043804|1043871|1043881|1043941
Gene000454	Isoform000894	+	1	1	1	1043943
Gene000454	Isoform000895	+	1	1	1	1043942
Gene000454	Isoform000896	+	1	1	1	1032389
Gene000454	Isoform000897	+	1	1	1	1043808
Gene000454	Isoform000898	+	1	1	1	1043871
Gene000454	Isoform000899	+	1	1	1	1043794
Gene000455	Isoform000900	+	1	1	1	1048614
Gene000456	Isoform000901	+	5	5	1|1|1|1|1	1061346|1061354|1061531|1061550|1061623
Gene000456	Isoform000902	+	1	1	1	1061548
Gene000456	Isoform000903	+	1	1	1	1059932
Gene000456	Isoform000904	+	1	1	1	1061349
Gene000456	Isoform000905	+	1	1	1	1061428
Gene000456	Isoform000906	+	1	1	1	1061333
Gene000456	Isoform000907	+	1	1	1	1061450
Gene000456	Isoform000908	+	4	4	1|1|1|1	1061349|1061426|1061447|1061564
Gene000456	Isoform000909	+	1	1	1	1061503
Gene000456	Isoform000910	+	1	1	1	1061565
Gene000456	Isoform000911	+	1	1	1	1061357
Gene000456	Isoform000912	+	61	28	1|1|1|1|1|1|3|1|1|1|4|1|3|1|1|1|1|5|17|4|1|1|2|2|1|1|2|1	1061305|1061306|1061321|1061330|1061332|1061333|1061342|1061344|1061349|1061350|1061354|1061358|1061360|1061409|1061410|1061421|1061423|1061425|1061426|1061428|1061442|1061444|1061445|1061446|1061447|1061512|1061532|1061545
Gene000456	Isoform000913	+	5	5	1|1|1|1|1	1061283|1061354|1061428|1061429|1061445
Gene000456	Isoform000914	+	5	5	1|1|1|1|1	1061033|1061332|1061426|1061428|1061531
Gene000456	Isoform000915	+	1	1	1	1061426
Gene000456	Isoform000916	+	1	1	1	1061349
Gene000456	Isoform000917	+	1	1	1	1061548
Gene000456	Isoform000918	+	1	1	1	1061428
Gene000457	Isoform000919	-	3	3	1|1|1	42672|42767|42777
Gene000457	Isoform000920	-	1	1	1	42727
Gene000458	Isoform000921	-	2	2	1|1	59652|59771
Gene000458	Isoform000922	-	2	2	1|1	59782|59840
Gene000459	Isoform000923	-	2	2	1|1	212130|212169
Gene000460	Isoform000924	-	2	2	1|1	226340|226916
Gene000460	Isoform000925	-	3	3	1|1|1	226344|226589|226709
Gene000461	Isoform000926	-	1	1	1	376424
Gene000462	Isoform000927	-	1	1	1	434386
Gene000462	Isoform000928	-	1	1	1	435182
Gene000463	Isoform000929	-	2	2	1|1	501007|501063
Gene000463	Isoform000930	-	1	1	1	502494
Gene000464	Isoform000931	-	1	1	1	508240
Gene000465	Isoform000932	-	3	2	1|2	534133|534201
Gene000465	Isoform000933	-	1	1	1	536838
Gene000465	Isoform000934	-	1	1	1	536854
Gene000466	Isoform000935	-	1	1	1	619958
Gene000466	Isoform000936	-	1	1	1	620003
Gene000466	Isoform000937	-	1	1	1	620022
Gene000466	Isoform000938	-	1	1	1	620085
Gene000466	Isoform000939	-	1	1	1	624511
Gene000467	Isoform000940	-	2	2	1|1	673730|673815
Gene000468	Isoform000941	-	3	3	1|1|1	681661|681700|681733
Gene000468	Isoform000942	-	1	1	1	681731
Gene000469	Isoform000943	-	1	1	1	691182
Gene000469	Isoform000944	-	3	3	1|1|1	691357|691491|691520
Gene000469	Isoform000945	-	1	1	1	691377
Gene000469	Isoform000946	-	1	1	1	691528
Gene000469	Isoform000947	-	1	1	1	691551
Gene000470	Isoform000948	-	1	1	1	715887
Gene000471	Isoform000949	-	1	1	1	828595
Gene000471	Isoform000950	-	1	1	1	830304
Gene000472	Isoform000951	-	16	10	1|1|1|1|1|3|3|3|1|1	901144|901156|901179|901188|901241|901243|901244|901245|901246|901256
Gene000472	Isoform000952	-	1	1	1	901182
Gene000472	Isoform000953	-	2	2	1|1	901245|901275
Gene000473	Isoform000954	-	2	2	1|1	964595|964658
Gene000473	Isoform000955	-	1	1	1	966713
Gene000474	Isoform000956	-	2	2	1|1	996528|996783
Gene000474	Isoform000957	-	1	1	1	996783
Gene000475	Isoform000958	-	1	1	1	1032087
Gene000475	Isoform000959	-	1	1	1	1032244
Gene000476	Isoform000960	+	1	1	1	137915
Gene000477	Isoform000961	+	1	1	1	204555
Gene000478	Isoform000962	+	11	8	1|1|1|2|3|1|1|1	786686|786703|786707|786833|786846|786871|787168|787222
Gene000478	Isoform000963	+	1	1	1	800877
Gene000478	Isoform000964	+	1	1	1	781296
Gene000478	Isoform000965	+	1	1	1	786875
Gene000478	Isoform000966	+	1	1	1	787165
Gene000478	Isoform000967	+	3	3	1|1|1	786833|787154|787165
Gene000479	Isoform000968	+	1	1	1	843696
Gene000480	Isoform000969	+	2	2	1|1	907075|907103
Gene000481	Isoform000970	+	1	1	1	937837
Gene000481	Isoform000971	+	1	1	1	937026
Gene000482	Isoform000972	+	1	1	1	994533
Gene000483	Isoform000973	-	1	1	1	143295
Gene000484	Isoform000974	-	1	1	1	202334
Gene000485	Isoform000975	-	2	2	1|1	425213|425244
Gene000486	Isoform000976	-	2	2	1|1	451778|451844
Gene000487	Isoform000977	-	2	2	1|1	485191|485340
Gene000488	Isoform000978	-	1	1	1	521137
Gene000488	Isoform000979	-	1	1	1	565504
Gene000489	Isoform000980	-	2	2	1|1	620255|620284
Gene000490	Isoform000981	-	2	2	1|1	671048|671102
Gene000490	Isoform000982	-	1	1	1	671066
Gene000490	Isoform000983	-	1	1	1	671112
Gene000490	Isoform000984	-	1	1	1	680076
Gene000491	Isoform000985	-	1	1	1	1017996
Gene000492	Isoform000986	+	1	1	1	535798
Gene000493	Isoform000987	+	2	2	1|1	715678|715679
Gene000494	Isoform000988	-	1	1	1	132708
Gene000495	Isoform000989	-	1	1	1	273939
Gene000495	Isoform000990	-	2	2	1|1	273980|274018
Gene000495	Isoform000991	-	3	3	1|1|1	274011|274036|274073
Gene000495	Isoform000992	-	1	1	1	274017
Gene000495	Isoform000993	-	1	1	1	279274
Gene000496	Isoform000994	-	2	2	1|1	290653|290718
Gene000497	Isoform000995	-	3	3	1|1|1	623963|624099|624214
Gene000497	Isoform000996	-	1	1	1	624142
Gene000497	Isoform000997	-	1	1	1	624213
Gene000498	Isoform000998	+	1	1	1	267572
Gene000499	Isoform000999	+	1	1	1	305373
Gene000499	Isoform001000	+	3	3	1|1|1	305355|305378|305428
Gene000500	Isoform001001	+	1	1	1	366945
Gene000501	Isoform001002	+	1	1	1	419795
Gene000501	Isoform001003	+	1	1	1	414900
Gene000502	Isoform001004	+	1	1	1	524244
Gene000502	Isoform001005	+	1	1	1	524367
Gene000502	Isoform001006	+	2	2	1|1	524297|524458
Gene000502	Isoform001007	+	1	1	1	524320
Gene000502	Isoform001008	+	2	2	1|1	524296|524367
Gene000502	Isoform001009	+	1	1	1	515336
Gene000502	Isoform001010	+	2	2	1|1	524391|524393
Gene000503	Isoform001011	+	1	1	1	638880
Gene000504	Isoform001012	+	1	1	1	653157
Gene000505	Isoform001013	+	1	1	1	748044
Gene000506	Isoform001014	+	1	1	1	754376
Gene000506	Isoform001015	+	1	1	1	754363
Gene000507	Isoform001016	+	1	1	1	761458
Gene000507	Isoform001017	+	1	1	1	761464
Gene000508	Isoform001018	+	1	1	1	794558
Gene000509	Isoform001019	+	1	1	1	832045
Gene000509	Isoform001020	+	2	1	2	831996
Gene000510	Isoform001021	+	5	5	1|1|1|1|1	1049742|1049831|1050400|1050513|1050853
Gene000510	Isoform001022	+	1	1	1	1050501
Gene000511	Isoform001023	-	1	1	1	124616
Gene000511	Isoform001024	-	1	1	1	124637
Gene000512	Isoform001025	-	1	1	1	265353
Gene000513	Isoform001026	-	1	1	1	318152
Gene000514	Isoform001027	-	1	1	1	638456
Gene000515	Isoform001028	-	1	1	1	657444
Gene000516	Isoform001029	-	1	1	1	766089
Gene000517	Isoform001030	-	5	5	1|1|1|1|1	771945|771955|772003|772011|772044
Gene000517	Isoform001031	-	1	1	1	773371
Gene000518	Isoform001032	-	1	1	1	806050
Gene000518	Isoform001033	-	1	1	1	806083
Gene000519	Isoform001034	-	1	1	1	833806
Gene000520	Isoform001035	+	1	1	1	25287
Gene000521	Isoform001036	+	1	1	1	588936
Gene000522	Isoform001037	+	1	1	1	599414
Gene000523	Isoform001038	+	1	1	1	699068
Gene000524	Isoform001039	+	1	1	1	701206
Gene000525	Isoform001040	+	1	1	1	748321
Gene000526	Isoform001041	+	1	1	1	784882
Gene000527	Isoform001042	+	1	1	1	822100
Gene000528	Isoform001043	+	1	1	1	869924
Gene000529	Isoform001044	+	1	1	1	882624
Gene000530	Isoform001045	+	1	1	1	971988
Gene000531	Isoform001046	+	3	3	1|1|1	973488|973504|973611
Gene000532	Isoform001047	+	1	1	1	986996
Gene000532	Isoform001048	+	1	1	1	987097
Gene000533	Isoform001049	-	2	2	1|1	243150|243223
Gene000534	Isoform001050	-	1	1	1	263234
Gene000535	Isoform001051	-	1	1	1	291684
Gene000536	Isoform001052	-	2	2	1|1	578633|578643
Gene000536	Isoform001053	-	1	1	1	578636
Gene000536	Isoform001054	-	1	1	1	578759
Gene000537	Isoform001055	-	1	1	1	625986
Gene000538	Isoform001056	-	1	1	1	640565
Gene000538	Isoform001057	-	1	1	1	640573
Gene000539	Isoform001058	-	1	1	1	682400
Gene000540	Isoform001059	-	2	2	1|1	707292|707338
Gene000541	Isoform001060	-	1	1	1	754994
Gene000542	Isoform001061	-	1	1	1	912015
Gene000542	Isoform001062	-	1	1	1	912040
Gene000543	Isoform001063	-	1	1	1	975171
Gene000544	Isoform001064	-	6	6	1|1|1|1|1|1	987433|987439|987492|987493|987501|987563
Gene000544	Isoform001065	-	2	2	1|1	987499|987520
Gene000545	Isoform001066	-	1	1	1	1087119
Gene000545	Isoform001067	-	1	1	1	1087206
Gene000545	Isoform001068	-	1	1	1	1088095
Gene000546	Isoform001069	+	13	5	1|1|1|2|8	15781|15782|15785|15802|15804
Gene000547	Isoform001070	-	1	1	1	2413
Gene000548	Isoform001071	-	1	1	1	4580
Gene000549	Isoform001072	-	1	1	1	5554
Gene000550	Isoform001073	-	2	2	1|1	8924|8937
Gene000551	Isoform001074	-	2	2	1|1	11099|11444
Gene000552	Isoform001075	-	1	1	1	19853
Gene000553	Isoform001076	-	1	1	1	20658
Gene000554	Isoform001077	-	2	2	1|1	21564|22109
Gene000555	Isoform001078	+	1	1	1	35708
Gene000555	Isoform001079	+	1	1	1	35711
Gene000555	Isoform001080	+	1	1	1	35711
Gene000556	Isoform001081	+	1	1	1	153441
Gene000557	Isoform001082	+	1	1	1	227513
Gene000558	Isoform001083	+	1	1	1	245308
Gene000559	Isoform001084	+	1	1	1	397837
Gene000560	Isoform001085	+	4	4	1|1|1|1	422384|422443|422502|422825
Gene000561	Isoform001086	+	1	1	1	565052
Gene000562	Isoform001087	+	1	1	1	968810
Gene000563	Isoform001088	+	1	1	1	1047500
Gene000564	Isoform001089	-	1	1	1	7468
Gene000565	Isoform001090	-	1	1	1	153417
Gene000566	Isoform001091	-	1	1	1	734954
Gene000566	Isoform001092	-	1	1	1	734969
Gene000566	Isoform001093	-	2	2	1|1	734994|735055
Gene000566	Isoform001094	-	1	1	1	734999
Gene000566	Isoform001095	-	1	1	1	735001
Gene000567	Isoform001096	-	1	1	1	747412
Gene000568	Isoform001097	-	1	1	1	767432
Gene000568	Isoform001098	-	1	1	1	767438
Gene000569	Isoform001099	-	2	2	1|1	803884|803885
Gene000569	Isoform001100	-	2	1	2	803886
Gene000569	Isoform001101	-	1	1	1	803886
Gene000570	Isoform001102	-	2	2	1|1	827936|827998
Gene000571	Isoform001103	-	3	3	1|1|1	854115|854119|854156
Gene000572	Isoform001104	-	1	1	1	871375
Gene000572	Isoform001105	-	1	1	1	871412
Gene000573	Isoform001106	-	2	2	1|1	960022|960223
Gene000573	Isoform001107	-	1	1	1	960076
Gene000573	Isoform001108	-	1	1	1	960224
Gene000573	Isoform001109	-	1	1	1	960239
Gene000573	Isoform001110	-	1	1	1	960290
Gene000573	Isoform001111	-	1	1	1	961423
Gene000573	Isoform001112	-	1	1	1	965170
Gene000574	Isoform001113	-	1	1	1	990155
Gene000574	Isoform001114	-	1	1	1	990176
Gene000574	Isoform001115	-	1	1	1	990178
Gene000574	Isoform001116	-	1	1	1	990192
Gene000574	Isoform001117	-	1	1	1	996912
Gene000574	Isoform001118	-	1	1	1	996913
Gene000575	Isoform001119	-	5	5	1|1|1|1|1	1170359|1170387|1170399|1170402|1170403
Gene000576	Isoform001120	-	26	8	1|1|1|1|1|6|13|2	1190118|1190124|1190154|1190160|1190168|1190169|1190170|1190171
Gene000576	Isoform001121	-	1	1	1	1190170
Gene000577	Isoform001122	+	4	4	1|1|1|1	120069|120119|120130|120134
Gene000578	Isoform001123	+	1	1	1	285542
Gene000579	Isoform001124	+	1	1	1	164364
Gene000580	Isoform001125	+	3	2	1|2	397941|398009
Gene000580	Isoform001126	+	1	1	1	397989
Gene000580	Isoform001127	+	1	1	1	397969
Gene000581	Isoform001128	+	1	1	1	411545
Gene000581	Isoform001129	+	1	1	1	411526
Gene000582	Isoform001130	+	2	2	1|1	535207|535288
Gene000583	Isoform001131	+	1	1	1	554261
Gene000584	Isoform001132	+	1	1	1	589857
Gene000585	Isoform001133	+	1	1	1	705304
Gene000586	Isoform001134	+	5	4	1|1|2|1	735404|735441|735498|735499
Gene000587	Isoform001135	+	1	1	1	774780
Gene000588	Isoform001136	+	1	1	1	825703
Gene000588	Isoform001137	+	2	2	1|1	822492|823091
Gene000588	Isoform001138	+	1	1	1	825713
Gene000589	Isoform001139	+	1	1	1	884151
Gene000590	Isoform001140	-	1	1	1	129888
Gene000590	Isoform001141	-	1	1	1	129933
Gene000590	Isoform001142	-	1	1	1	129934
Gene000590	Isoform001143	-	1	1	1	129946
Gene000590	Isoform001144	-	1	1	1	131336
Gene000591	Isoform001145	-	5	5	1|1|1|1|1	590894|590907|590969|591024|591044
Gene000591	Isoform001146	-	1	1	1	590969
Gene000591	Isoform001147	-	1	1	1	591045
Gene000592	Isoform001148	-	1	1	1	775414
Gene000592	Isoform001149	-	1	1	1	775837
Gene000593	Isoform001150	-	4	4	1|1|1|1	854143|854463|854746|854828
Gene000594	Isoform001151	-	2	2	1|1	888861|888932
Gene000594	Isoform001152	-	1	1	1	893244
Gene000595	Isoform001153	+	2	2	1|1	17303|17355
Gene000596	Isoform001154	+	1	1	1	134642
Gene000597	Isoform001155	+	1	1	1	588640
Gene000597	Isoform001156	+	1	1	1	588634
Gene000598	Isoform001157	+	2	1	2	641592
Gene000599	Isoform001158	-	1	1	1	426063
Gene000599	Isoform001159	-	1	1	1	426096
Gene000599	Isoform001160	-	1	1	1	426141
Gene000600	Isoform001161	+	4	3	1|2|1	112423|112425|112586
Gene000601	Isoform001162	+	3	3	1|1|1	138718|138756|138846
Gene000602	Isoform001163	+	1	1	1	156812
Gene000603	Isoform001164	+	1	1	1	187578
Gene000604	Isoform001165	+	1	1	1	198070
Gene000604	Isoform001166	+	1	1	1	198070
Gene000605	Isoform001167	+	4	4	1|1|1|1	205090|205154|205175|205275
Gene000606	Isoform001168	+	1	1	1	219654
Gene000607	Isoform001169	+	6	6	1|1|1|1|1|1	230716|230881|230912|230947|230977|231311
Gene000607	Isoform001170	+	1	1	1	230951
Gene000608	Isoform001171	+	1	1	1	233229
Gene000608	Isoform001172	+	1	1	1	236026
Gene000608	Isoform001173	+	9	5	1|3|2|2|1	236020|236026|236027|236044|236069
Gene000608	Isoform001174	+	1	1	1	236021
Gene000609	Isoform001175	+	1	1	1	280528
Gene000610	Isoform001176	+	1	1	1	291550
Gene000611	Isoform001177	+	3	3	1|1|1	313763|313832|313898
Gene000611	Isoform001178	+	1	1	1	353038
Gene000611	Isoform001179	+	1	1	1	338083
Gene000612	Isoform001180	+	3	3	1|1|1	369573|369638|369699
Gene000612	Isoform001181	+	1	1	1	368519
Gene000613	Isoform001182	+	2	2	1|1	374267|374564
Gene000613	Isoform001183	+	1	1	1	374335
Gene000614	Isoform001184	+	2	2	1|1	388915|389024
Gene000615	Isoform001185	+	2	2	1|1	403410|403467
Gene000616	Isoform001186	+	3	3	1|1|1	455970|456048|456082
Gene000616	Isoform001187	+	1	1	1	455931
Gene000616	Isoform001188	+	1	1	1	455969
Gene000616	Isoform001189	+	1	1	1	455999
Gene000616	Isoform001190	+	1	1	1	456002
Gene000616	Isoform001191	+	1	1	1	456083
Gene000616	Isoform001192	+	1	1	1	455991
Gene000616	Isoform001193	+	1	1	1	455969
Gene000616	Isoform001194	+	1	1	1	456041
Gene000616	Isoform001195	+	1	1	1	455996
Gene000616	Isoform001196	+	1	1	1	455969
Gene000617	Isoform001197	+	1	1	1	474594
Gene000617	Isoform001198	+	2	2	1|1	474636|474638
Gene000618	Isoform001199	+	3	3	1|1|1	480288|480403|480510
Gene000619	Isoform001200	+	2	2	1|1	487443|487469
Gene000619	Isoform001201	+	1	1	1	487443
Gene000619	Isoform001202	+	2	2	1|1	487443|487468
Gene000620	Isoform001203	+	3	3	1|1|1	595479|595669|595819
Gene000620	Isoform001204	+	2	2	1|1	595458|595484
Gene000621	Isoform001205	+	2	2	1|1	600825|600881
Gene000622	Isoform001206	+	3	3	1|1|1	675115|675276|675281
Gene000622	Isoform001207	+	1	1	1	669946
Gene000623	Isoform001208	+	1	1	1	701320
Gene000623	Isoform001209	+	2	2	1|1	720761|720794
Gene000624	Isoform001210	+	1	1	1	762571
Gene000625	Isoform001211	+	2	2	1|1	785182|785255
Gene000625	Isoform001212	+	1	1	1	785130
Gene000625	Isoform001213	+	1	1	1	785134
Gene000626	Isoform001214	+	4	3	1|2|1	866249|866256|866332
Gene000627	Isoform001215	-	1	1	1	48207
Gene000627	Isoform001216	-	1	1	1	57449
Gene000627	Isoform001217	-	1	1	1	57450
Gene000627	Isoform001218	-	2	2	1|1	57450|57469
Gene000627	Isoform001219	-	1	1	1	57450
Gene000627	Isoform001220	-	1	1	1	57450
Gene000627	Isoform001221	-	1	1	1	57451
Gene000627	Isoform001222	-	1	1	1	57467
Gene000627	Isoform001223	-	1	1	1	57468
Gene000627	Isoform001224	-	1	1	1	57468
Gene000627	Isoform001225	-	1	1	1	57531
Gene000627	Isoform001226	-	1	1	1	57533
Gene000627	Isoform001227	-	1	1	1	57538
Gene000627	Isoform001228	-	1	1	1	57538
Gene000627	Isoform001229	-	1	1	1	57539
Gene000627	Isoform001230	-	1	1	1	57540
Gene000627	Isoform001231	-	1	1	1	57556
Gene000627	Isoform001232	-	2	2	1|1	57390|57449
Gene000627	Isoform001233	-	1	1	1	57409
Gene000627	Isoform001234	-	2	2	1|1	57432|57531
Gene000627	Isoform001235	-	1	1	1	57438
Gene000627	Isoform001236	-	1	1	1	57441
Gene000627	Isoform001237	-	1	1	1	57443
Gene000627	Isoform001238	-	1	1	1	57444
Gene000628	Isoform001239	-	1	1	1	113500
Gene000629	Isoform001240	-	3	3	1|1|1	205620|205652|205694
Gene000630	Isoform001241	-	1	1	1	236510
Gene000630	Isoform001242	-	1	1	1	236510
Gene000630	Isoform001243	-	1	1	1	236563
Gene000630	Isoform001244	-	1	1	1	236568
Gene000630	Isoform001245	-	1	1	1	236570
Gene000630	Isoform001246	-	1	1	1	239130
Gene000631	Isoform001247	-	1	1	1	272039
Gene000631	Isoform001248	-	1	1	1	272076
Gene000632	Isoform001249	-	1	1	1	309718
Gene000633	Isoform001250	-	1	1	1	403867
Gene000633	Isoform001251	-	2	2	1|1	403922|403924
Gene000633	Isoform001252	-	3	2	2|1	403923|403987
Gene000633	Isoform001253	-	1	1	1	403935
Gene000633	Isoform001254	-	2	2	1|1	403931|404014
Gene000633	Isoform001255	-	1	1	1	404049
Gene000634	Isoform001256	-	1	1	1	420079
Gene000634	Isoform001257	-	1	1	1	429347
Gene000635	Isoform001258	-	1	1	1	459616
Gene000636	Isoform001259	-	3	3	1|1|1	487585|487586|487863
Gene000637	Isoform001260	-	1	1	1	513105
Gene000637	Isoform001261	-	3	3	1|1|1	513748|513854|513938
Gene000637	Isoform001262	-	1	1	1	513782
Gene000637	Isoform001263	-	1	1	1	513900
Gene000638	Isoform001264	-	2	2	1|1	520946|521131
Gene000638	Isoform001265	-	1	1	1	520955
Gene000638	Isoform001266	-	1	1	1	525455
Gene000639	Isoform001267	-	2	2	1|1	529626|529816
Gene000639	Isoform001268	-	1	1	1	534483
Gene000639	Isoform001269	-	6	6	1|1|1|1|1|1	529628|529767|529775|529812|529816|529863
Gene000639	Isoform001270	-	1	1	1	529682
Gene000639	Isoform001271	-	1	1	1	529774
Gene000639	Isoform001272	-	2	2	1|1	533358|534997
Gene000639	Isoform001273	-	1	1	1	534480
Gene000639	Isoform001274	-	1	1	1	534482
Gene000640	Isoform001275	-	1	1	1	552124
Gene000640	Isoform001276	-	1	1	1	552136
Gene000640	Isoform001277	-	1	1	1	552150
Gene000641	Isoform001278	-	1	1	1	564214
Gene000641	Isoform001279	-	1	1	1	564216
Gene000641	Isoform001280	-	1	1	1	564219
Gene000642	Isoform001281	-	2	2	1|1	607531|607602
Gene000643	Isoform001282	-	1	1	1	621315
Gene000643	Isoform001283	-	1	1	1	621629
Gene000643	Isoform001284	-	1	1	1	621630
Gene000643	Isoform001285	-	1	1	1	622807
Gene000643	Isoform001286	-	11	11	1|1|1|1|1|1|1|1|1|1|1	621382|621453|621531|621561|621564|621569|621583|621585|621627|621629|621631
Gene000643	Isoform001287	-	20	16	1|1|1|1|1|1|2|2|1|1|1|1|1|1|2|2	621383|621451|621453|621454|621456|621559|621564|621565|621566|621568|621569|621585|621588|621627|621629|621631
Gene000643	Isoform001288	-	1	1	1	621452
Gene000643	Isoform001289	-	1	1	1	621452
Gene000643	Isoform001290	-	1	1	1	621566
Gene000643	Isoform001291	-	1	1	1	621585
Gene000643	Isoform001292	-	1	1	1	621585
Gene000644	Isoform001293	-	1	1	1	630331
Gene000644	Isoform001294	-	2	2	1|1	630332|630467
Gene000644	Isoform001295	-	1	1	1	630466
Gene000645	Isoform001296	-	1	1	1	788756
Gene000645	Isoform001297	-	1	1	1	788864
Gene000645	Isoform001298	-	1	1	1	789427
Gene000646	Isoform001299	-	1	1	1	866829
Gene000647	Isoform001300	+	1	1	1	223949
Gene000647	Isoform001301	+	1	1	1	223999
Gene000647	Isoform001302	+	1	1	1	223996
Gene000647	Isoform001303	+	1	1	1	223997
Gene000648	Isoform001304	+	1	1	1	288276
Gene000649	Isoform001305	+	3	3	1|1|1	328798|329718|331425
Gene000649	Isoform001306	+	1	1	1	331425
Gene000649	Isoform001307	+	3	2	1|2	330734|330752
Gene000649	Isoform001308	+	1	1	1	331416
Gene000649	Isoform001309	+	1	1	1	331417
Gene000649	Isoform001310	+	4	2	1|3	331356|331425
Gene000649	Isoform001311	+	1	1	1	330750
Gene000650	Isoform001312	+	1	1	1	339155
Gene000650	Isoform001313	+	3	3	1|1|1	339092|339163|339247
Gene000650	Isoform001314	+	2	2	1|1	339093|339178
Gene000651	Isoform001315	+	8	8	1|1|1|1|1|1|1|1	364114|364137|364157|364182|364235|364264|364283|364292
Gene000651	Isoform001316	+	7	6	1|1|1|1|2|1	363122|363197|363225|363241|363261|363277
Gene000651	Isoform001317	+	1	1	1	363310
Gene000651	Isoform001318	+	1	1	1	360478
Gene000651	Isoform001319	+	2	2	1|1	363248|363253
Gene000651	Isoform001320	+	1	1	1	364262
Gene000651	Isoform001321	+	1	1	1	358800
Gene000652	Isoform001322	+	1	1	1	415127
Gene000653	Isoform001323	+	1	1	1	428017
Gene000654	Isoform001324	+	3	3	1|1|1	440912|440964|441069
Gene000654	Isoform001325	+	1	1	1	441071
Gene000654	Isoform001326	+	2	2	1|1	440173|440328
Gene000654	Isoform001327	+	1	1	1	441071
Gene000655	Isoform001328	+	2	2	1|1	460707|461359
Gene000655	Isoform001329	+	3	3	1|1|1	460783|461343|461401
Gene000655	Isoform001330	+	1	1	1	459709
Gene000655	Isoform001331	+	1	1	1	461306
Gene000655	Isoform001332	+	1	1	1	461398
Gene000656	Isoform001333	+	3	3	1|1|1	473995|474078|474198
Gene000657	Isoform001334	+	1	1	1	498661
Gene000658	Isoform001335	+	3	3	1|1|1	606284|606374|606403
Gene000658	Isoform001336	+	1	1	1	606407
Gene000658	Isoform001337	+	1	1	1	606287
Gene000658	Isoform001338	+	1	1	1	606447
Gene000659	Isoform001339	+	14	12	2|2|1|1|1|1|1|1|1|1|1|1	640910|640939|641012|641039|641043|641084|641118|641132|641144|641166|641207|641216
Gene000659	Isoform001340	+	1	1	1	641141
Gene000659	Isoform001341	+	3	3	1|1|1	641081|641086|641166
Gene000659	Isoform001342	+	1	1	1	641151
Gene000659	Isoform001343	+	1	1	1	641166
Gene000659	Isoform001344	+	1	1	1	641043
Gene000659	Isoform001345	+	1	1	1	641086
Gene000659	Isoform001346	+	1	1	1	641079
Gene000659	Isoform001347	+	1	1	1	641171
Gene000659	Isoform001348	+	1	1	1	641145
Gene000659	Isoform001349	+	1	1	1	641167
Gene000659	Isoform001350	+	1	1	1	641151
Gene000660	Isoform001351	+	1	1	1	860562
Gene000661	Isoform001352	+	2	2	1|1	911497|911511
Gene000661	Isoform001353	+	1	1	1	911497
Gene000661	Isoform001354	+	1	1	1	911510
Gene000661	Isoform001355	+	1	1	1	911424
Gene000662	Isoform001356	+	1	1	1	925432
Gene000663	Isoform001357	+	4	4	1|1|1|1	982514|982530|982533|982631
Gene000663	Isoform001358	+	1	1	1	982534
Gene000663	Isoform001359	+	1	1	1	982502
Gene000664	Isoform001360	-	1	1	1	58225
Gene000665	Isoform001361	-	1	1	1	96122
Gene000665	Isoform001362	-	1	1	1	96123
Gene000666	Isoform001363	-	1	1	1	141908
Gene000667	Isoform001364	-	1	1	1	339256
Gene000668	Isoform001365	-	1	1	1	342328
Gene000668	Isoform001366	-	1	1	1	342339
Gene000669	Isoform001367	-	2	2	1|1	371076|371288
Gene000669	Isoform001368	-	1	1	1	371286
Gene000669	Isoform001369	-	1	1	1	371293
Gene000669	Isoform001370	-	1	1	1	371308
Gene000670	Isoform001371	-	2	2	1|1	378197|378287
Gene000670	Isoform001372	-	1	1	1	378308
Gene000670	Isoform001373	-	1	1	1	378308
Gene000670	Isoform001374	-	1	1	1	379081
Gene000671	Isoform001375	-	1	1	1	415217
Gene000671	Isoform001376	-	2	2	1|1	415237|415409
Gene000671	Isoform001377	-	5	5	1|1|1|1|1	415254|415385|415390|415408|415409
Gene000671	Isoform001378	-	1	1	1	419302
Gene000671	Isoform001379	-	1	1	1	422529
Gene000672	Isoform001380	-	1	1	1	454495
Gene000673	Isoform001381	-	1	1	1	590546
Gene000674	Isoform001382	-	2	2	1|1	607227|607233
Gene000675	Isoform001383	-	2	2	1|1	615900|616018
Gene000675	Isoform001384	-	1	1	1	615900
Gene000675	Isoform001385	-	1	1	1	617514
Gene000675	Isoform001386	-	1	1	1	621046
Gene000675	Isoform001387	-	1	1	1	621541
Gene000675	Isoform001388	-	1	1	1	622344
Gene000676	Isoform001389	-	1	1	1	641787
Gene000676	Isoform001390	-	4	4	1|1|1|1	642487|642568|642628|642766
Gene000677	Isoform001391	-	1	1	1	664669
Gene000678	Isoform001392	-	1	1	1	704725
Gene000678	Isoform001393	-	1	1	1	711578
Gene000679	Isoform001394	-	1	1	1	735661
Gene000679	Isoform001395	-	1	1	1	735687
Gene000679	Isoform001396	-	4	4	1|1|1|1	735693|735747|735837|735880
Gene000680	Isoform001397	-	1	1	1	741946
Gene000681	Isoform001398	-	1	1	1	784689
Gene000681	Isoform001399	-	1	1	1	784702
Gene000681	Isoform001400	-	1	1	1	786115
Gene000682	Isoform001401	-	1	1	1	808554
Gene000683	Isoform001402	-	5	3	1|3|1	853513|853646|853653
Gene000683	Isoform001403	-	1	1	1	857599
Gene000684	Isoform001404	-	3	3	1|1|1	923121|923145|923221
Gene000684	Isoform001405	-	1	1	1	923245
Gene000685	Isoform001406	-	1	1	1	953605
Gene000686	Isoform001407	+	1	1	1	22351
Gene000686	Isoform001408	+	1	1	1	26463
Gene000686	Isoform001409	+	1	1	1	22449
Gene000686	Isoform001410	+	2	2	1|1	26434|26504
Gene000686	Isoform001411	+	1	1	1	28612
Gene000686	Isoform001412	+	1	1	1	26506
Gene000687	Isoform001413	+	1	1	1	35105
Gene000687	Isoform001414	+	1	1	1	35035
Gene000688	Isoform001415	+	4	4	1|1|1|1	59298|59303|59412|59415
Gene000689	Isoform001416	+	1	1	1	234594
Gene000689	Isoform001417	+	4	3	2|1|1	234507|234508|234601
Gene000689	Isoform001418	+	1	1	1	234601
Gene000690	Isoform001419	+	1	1	1	243980
Gene000690	Isoform001420	+	1	1	1	244011
Gene000691	Isoform001421	+	1	1	1	265707
Gene000692	Isoform001422	+	1	1	1	295468
Gene000692	Isoform001423	+	1	1	1	295424
Gene000693	Isoform001424	+	1	1	1	380245
Gene000693	Isoform001425	+	1	1	1	380257
Gene000694	Isoform001426	+	3	3	1|1|1	399430|399517|399981
Gene000695	Isoform001427	+	2	1	2	408541
Gene000696	Isoform001428	+	2	2	1|1	475280|475371
Gene000697	Isoform001429	+	1	1	1	597514
Gene000698	Isoform001430	+	1	1	1	612732
Gene000698	Isoform001431	+	1	1	1	612820
Gene000698	Isoform001432	+	1	1	1	612854
Gene000699	Isoform001433	+	5	5	1|1|1|1|1	653370|653447|653475|653509|653590
Gene000699	Isoform001434	+	1	1	1	653533
Gene000699	Isoform001435	+	1	1	1	653493
Gene000699	Isoform001436	+	1	1	1	653521
Gene000699	Isoform001437	+	1	1	1	643175
Gene000700	Isoform001438	+	1	1	1	668986
Gene000700	Isoform001439	+	1	1	1	668951
Gene000700	Isoform001440	+	1	1	1	668890
Gene000701	Isoform001441	+	2	2	1|1	821334|821348
Gene000702	Isoform001442	+	1	1	1	853164
Gene000703	Isoform001443	-	1	1	1	6876
Gene000703	Isoform001444	-	1	1	1	6889
Gene000704	Isoform001445	-	3	3	1|1|1	64567|64619|64737
Gene000704	Isoform001446	-	1	1	1	64661
Gene000705	Isoform001447	-	2	2	1|1	73005|73454
Gene000705	Isoform001448	-	3	3	1|1|1	76494|76567|76632
Gene000706	Isoform001449	-	1	1	1	116504
Gene000707	Isoform001450	-	1	1	1	131207
Gene000708	Isoform001451	-	2	2	1|1	180334|180429
Gene000709	Isoform001452	-	1	1	1	204321
Gene000709	Isoform001453	-	3	3	1|1|1	204389|204580|204640
Gene000710	Isoform001454	-	3	3	1|1|1	275154|275204|275207
Gene000710	Isoform001455	-	1	1	1	275204
Gene000710	Isoform001456	-	1	1	1	277354
Gene000711	Isoform001457	-	1	1	1	306650
Gene000712	Isoform001458	-	1	1	1	332796
Gene000712	Isoform001459	-	2	2	1|1	332667|332796
Gene000713	Isoform001460	-	1	1	1	338526
Gene000713	Isoform001461	-	1	1	1	338528
Gene000714	Isoform001462	-	3	3	1|1|1	346296|346479|346538
Gene000715	Isoform001463	-	1	1	1	413003
Gene000716	Isoform001464	-	1	1	1	549922
Gene000717	Isoform001465	-	2	2	1|1	562319|562320
Gene000718	Isoform001466	-	1	1	1	613532
Gene000718	Isoform001467	-	1	1	1	613625
Gene000718	Isoform001468	-	1	1	1	613641
Gene000719	Isoform001469	-	1	1	1	677732
Gene000719	Isoform001470	-	1	1	1	683273
Gene000719	Isoform001471	-	1	1	1	683514
Gene000719	Isoform001472	-	1	1	1	683514
Gene000719	Isoform001473	-	1	1	1	683524
Gene000719	Isoform001474	-	1	1	1	699715
Gene000720	Isoform001475	-	2	2	1|1	705450|705557
Gene000720	Isoform001476	-	1	1	1	705523
Gene000720	Isoform001477	-	1	1	1	705535
Gene000720	Isoform001478	-	1	1	1	705557
Gene000720	Isoform001479	-	1	1	1	705557
Gene000720	Isoform001480	-	1	1	1	705567
Gene000720	Isoform001481	-	1	1	1	709486
Gene000721	Isoform001482	-	1	1	1	723475
Gene000722	Isoform001483	-	4	4	1|1|1|1	752220|752245|752312|752390
Gene000723	Isoform001484	-	1	1	1	795166
Gene000724	Isoform001485	-	3	3	1|1|1	816548|816592|816616
Gene000725	Isoform001486	-	1	1	1	821516
Gene000725	Isoform001487	-	2	2	1|1	821537|822349
Gene000725	Isoform001488	-	1	1	1	821672
Gene000725	Isoform001489	-	1	1	1	821682
Gene000725	Isoform001490	-	1	1	1	821691
Gene000725	Isoform001491	-	1	1	1	821704
Gene000726	Isoform001492	+	1	1	1	11887
Gene000726	Isoform001493	+	1	1	1	5469
Gene000726	Isoform001494	+	1	1	1	76789
Gene000726	Isoform001495	+	1	1	1	76795
Gene000726	Isoform001496	+	1	1	1	76909
Gene000727	Isoform001497	+	2	2	1|1	258868|258937
Gene000728	Isoform001498	+	2	2	1|1	277658|277726
Gene000728	Isoform001499	+	1	1	1	277818
Gene000729	Isoform001500	-	1	1	1	1568
Gene000730	Isoform001501	-	57	25	1|1|1|1|2|1|6|7|2|3|2|1|1|1|1|2|1|2|10|1|1|1|1|1|6	157697|157705|157712|157752|157753|157754|157756|157757|157761|157762|157763|157770|157772|157778|157779|157785|157818|157822|157823|157824|157825|157834|157843|157844|157845
Gene000730	Isoform001502	-	2	2	1|1	157754|157840
Gene000730	Isoform001503	-	1	1	1	157772
Gene000731	Isoform001504	-	1	1	1	185230
Gene000731	Isoform001505	-	1	1	1	185257
Gene000731	Isoform001506	-	1	1	1	185337
Gene000731	Isoform001507	-	1	1	1	185338
Gene000732	Isoform001508	-	1	1	1	259760
Gene000733	Isoform001509	+	1	1	1	219748
Gene000734	Isoform001510	+	3	2	2|1	310149|310151
Gene000735	Isoform001511	+	4	4	1|1|1|1	331499|331602|331605|331607
Gene000736	Isoform001512	+	1	1	1	515073
Gene000737	Isoform001513	+	2	2	1|1	670250|670306
Gene000738	Isoform001514	+	1	1	1	674162
Gene000739	Isoform001515	+	1	1	1	679829
Gene000740	Isoform001516	+	200	62	1|1|1|1|1|1|2|1|1|3|1|1|1|1|2|2|7|8|3|1|4|3|1|7|2|1|1|2|3|3|3|4|1|1|6|4|4|2|1|2|3|2|1|2|1|1|3|4|10|1|13|6|44|1|1|1|3|1|3|2|1|1	683653|683654|683659|683666|683668|683669|683670|683675|683681|683682|683684|683690|683691|683693|683694|683709|683711|683712|683713|683720|683722|683723|683739|683740|683741|683747|683763|683764|683771|683773|683774|683775|683776|683797|683798|683799|683800|683812|683834|683835|683853|683855|683858|683864|683866|683869|683870|683871|683872|683874|683876|683877|683878|683881|683883|683886|683887|…
Gene000740	Isoform001517	+	1	1	1	683878
Gene000740	Isoform001518	+	1	1	1	683878
Gene000740	Isoform001519	+	1	1	1	683878
Gene000740	Isoform001520	+	5	5	1|1|1|1|1	683681|683713|683722|683798|683880
Gene000741	Isoform001521	-	1	1	1	166076
Gene000742	Isoform001522	-	2	2	1|1	219932|219995
Gene000742	Isoform001523	-	7	7	1|1|1|1|1|1|1	219968|220068|220071|220100|220121|220129|220725
Gene000742	Isoform001524	-	2	2	1|1	219969|220468
Gene000742	Isoform001525	-	7	6	1|1|2|1|1|1	220071|220121|220468|220469|220470|220655
Gene000742	Isoform001526	-	1	1	1	220129
Gene000742	Isoform001527	-	1	1	1	220489
Gene000743	Isoform001528	-	1	1	1	229634
Gene000743	Isoform001529	-	1	1	1	229634
Gene000744	Isoform001530	-	1	1	1	248815
Gene000745	Isoform001531	-	1	1	1	419153
Gene000746	Isoform001532	-	7	6	1|1|1|2|1|1	637534|637617|637630|637631|637632|637646
Gene000747	Isoform001533	-	2	2	1|1	654425|654512
Gene000748	Isoform001534	+	1	1	1	272700
Gene000748	Isoform001535	+	2	2	1|1	272700|272753
Gene000748	Isoform001536	+	1	1	1	272780
Gene000749	Isoform001537	+	2	2	1|1	400365|400639
Gene000749	Isoform001538	+	1	1	1	401051
Gene000749	Isoform001539	+	1	1	1	401070
Gene000750	Isoform001540	+	1	1	1	445961
Gene000751	Isoform001541	+	2	2	1|1	644986|645100
Gene000751	Isoform001542	+	1	1	1	645096
Gene000751	Isoform001543	+	1	1	1	645152
Gene000752	Isoform001544	+	1	1	1	653310
Gene000753	Isoform001545	+	2	2	1|1	696885|697346
Gene000754	Isoform001546	+	3	3	1|1|1	726586|726678|726737
Gene000754	Isoform001547	+	2	2	1|1	724634|726698
Gene000755	Isoform001548	+	1	1	1	736738
Gene000756	Isoform001549	+	1	1	1	828939
Gene000756	Isoform001550	+	1	1	1	829309
Gene000756	Isoform001551	+	1	1	1	828935
Gene000757	Isoform001552	+	2	2	1|1	840803|840900
Gene000757	Isoform001553	+	1	1	1	839281
Gene000757	Isoform001554	+	1	1	1	839281
Gene000757	Isoform001555	+	1	1	1	840782
Gene000757	Isoform001556	+	1	1	1	840781
Gene000758	Isoform001557	+	2	2	1|1	912271|912448
Gene000758	Isoform001558	+	1	1	1	912448
Gene000759	Isoform001559	-	1	1	1	235086
Gene000759	Isoform001560	-	2	2	1|1	235092|235171
Gene000759	Isoform001561	-	3	3	1|1|1	235057|235157|235180
Gene000759	Isoform001562	-	1	1	1	235201
Gene000760	Isoform001563	-	1	1	1	407169
Gene000761	Isoform001564	-	1	1	1	418089
Gene000762	Isoform001565	-	1	1	1	518582
Gene000763	Isoform001566	-	1	1	1	527887
Gene000764	Isoform001567	-	1	1	1	554051
Gene000765	Isoform001568	-	1	1	1	589549
Gene000766	Isoform001569	-	1	1	1	697426
Gene000766	Isoform001570	-	1	1	1	702578
Gene000766	Isoform001571	-	1	1	1	702579
Gene000767	Isoform001572	-	1	1	1	738573
Gene000767	Isoform001573	-	1	1	1	738680
Gene000768	Isoform001574	-	1	1	1	750009
Gene000769	Isoform001575	-	2	2	1|1	795900|796046
Gene000770	Isoform001576	-	4	4	1|1|1|1	843627|843721|843903|843958
Gene000770	Isoform001577	-	3	3	1|1|1	843901|843908|843921
Gene000770	Isoform001578	-	1	1	1	843903
Gene000770	Isoform001579	-	1	1	1	843925
Gene000771	Isoform001580	-	1	1	1	863998
Gene000771	Isoform001581	-	1	1	1	864041
Gene000772	Isoform001582	+	1	1	1	20870
Gene000772	Isoform001583	+	1	1	1	20784
Gene000772	Isoform001584	+	1	1	1	20865
Gene000772	Isoform001585	+	1	1	1	20866
Gene000772	Isoform001586	+	1	1	1	20752
Gene000772	Isoform001587	+	1	1	1	20864
Gene000773	Isoform001588	+	1	1	1	56258
Gene000773	Isoform001589	+	1	1	1	56268
Gene000773	Isoform001590	+	1	1	1	56247
Gene000774	Isoform001591	+	1	1	1	470121
Gene000775	Isoform001592	+	1	1	1	518902
Gene000775	Isoform001593	+	1	1	1	515623
Gene000775	Isoform001594	+	1	1	1	518902
Gene000775	Isoform001595	+	1	1	1	518903
Gene000776	Isoform001596	+	1	1	1	540551
Gene000776	Isoform001597	+	1	1	1	540609
Gene000777	Isoform001598	+	1	1	1	672920
Gene000778	Isoform001599	+	6	6	1|1|1|1|1|1	728166|728219|728237|728256|728316|728380
Gene000779	Isoform001600	+	1	1	1	733602
Gene000780	Isoform001601	+	1	1	1	747097
Gene000781	Isoform001602	+	5	5	1|1|1|1|1	757650|757725|757770|757795|757885
Gene000781	Isoform001603	+	1	1	1	753920
Gene000781	Isoform001604	+	1	1	1	757783
Gene000781	Isoform001605	+	1	1	1	757796
Gene000781	Isoform001606	+	1	1	1	754488
Gene000781	Isoform001607	+	1	1	1	757802
Gene000781	Isoform001608	+	1	1	1	757768
Gene000781	Isoform001609	+	1	1	1	757768
Gene000782	Isoform001610	+	1	1	1	777479
Gene000782	Isoform001611	+	1	1	1	769778
Gene000783	Isoform001612	+	3	3	1|1|1	797770|797792|797980
Gene000784	Isoform001613	+	2	2	1|1	858847|858920
Gene000785	Isoform001614	+	1	1	1	867935
Gene000785	Isoform001615	+	7	7	1|1|1|1|1|1|1	871400|871454|871477|871479|871480|871512|871875
Gene000786	Isoform001616	+	1	1	1	902860
Gene000786	Isoform001617	+	2	2	1|1	902830|903077
Gene000786	Isoform001618	+	1	1	1	902862
Gene000787	Isoform001619	+	1	1	1	928767
Gene000787	Isoform001620	+	2	2	1|1	928737|928819
Gene000788	Isoform001621	+	1	1	1	963103
Gene000789	Isoform001622	+	1	1	1	1032739
Gene000789	Isoform001623	+	1	1	1	1032738
Gene000790	Isoform001624	-	1	1	1	79349
Gene000790	Isoform001625	-	1	1	1	79492
Gene000791	Isoform001626	-	1	1	1	216406
Gene000792	Isoform001627	-	2	2	1|1	471313|471316
Gene000793	Isoform001628	-	1	1	1	479267
Gene000794	Isoform001629	-	1	1	1	559988
Gene000795	Isoform001630	-	1	1	1	646489
Gene000795	Isoform001631	-	3	2	2|1	646491|646492
Gene000795	Isoform001632	-	1	1	1	652460
Gene000796	Isoform001633	-	1	1	1	683438
Gene000797	Isoform001634	-	1	1	1	713492
Gene000798	Isoform001635	-	1	1	1	731147
Gene000798	Isoform001636	-	1	1	1	731198
Gene000798	Isoform001637	-	1	1	1	731202
Gene000799	Isoform001638	-	2	2	1|1	779352|779418
Gene000800	Isoform001639	-	1	1	1	826336
Gene000800	Isoform001640	-	1	1	1	826365
Gene000800	Isoform001641	-	1	1	1	826398
Gene000800	Isoform001642	-	1	1	1	826415
Gene000800	Isoform001643	-	2	2	1|1	826452|826521
Gene000801	Isoform001644	-	2	1	2	872757
Gene000802	Isoform001645	-	1	1	1	880536
Gene000803	Isoform001646	-	8	7	1|1|1|1|1|2|1	885470|885492|885551|885554|885556|885568|885570
Gene000804	Isoform001647	-	1	1	1	903996
Gene000805	Isoform001648	-	9	8	1|1|1|1|1|2|1|1	905281|905356|905357|905358|905364|905366|905368|905372
Gene000806	Isoform001649	-	1	1	1	912921
Gene000806	Isoform001650	-	1	1	1	912921
Gene000807	Isoform001651	-	10	8	1|1|1|1|2|1|1|2	932438|932507|932652|932668|932724|932741|932762|932763
Gene000807	Isoform001652	-	1	1	1	932651
Gene000807	Isoform001653	-	1	1	1	932697
Gene000807	Isoform001654	-	1	1	1	932724
Gene000807	Isoform001655	-	1	1	1	932749
Gene000807	Isoform001656	-	1	1	1	932762
Gene000808	Isoform001657	-	1	1	1	946114
Gene000809	Isoform001658	-	2	2	1|1	949739|949817
Gene000810	Isoform001659	-	1	1	1	969934
Gene000811	Isoform001660	-	1	1	1	975935
Gene000811	Isoform001661	-	1	1	1	975965
Gene000811	Isoform001662	-	2	2	1|1	975966|976099
Gene000812	Isoform001663	-	3	3	1|1|1	982272|982423|982501
Gene000813	Isoform001664	-	1	1	1	983879
Gene000813	Isoform001665	-	2	2	1|1	983887|983969
Gene000814	Isoform001666	-	2	2	1|1	988952|988956
Gene000814	Isoform001667	-	1	1	1	989493
Gene000814	Isoform001668	-	1	1	1	991640
Gene000814	Isoform001669	-	1	1	1	994033
Gene000814	Isoform001670	-	1	1	1	988957
Gene000814	Isoform001671	-	1	1	1	988957
Gene000814	Isoform001672	-	1	1	1	988957
Gene000814	Isoform001673	-	1	1	1	988957
Gene000814	Isoform001674	-	1	1	1	988957
Gene000814	Isoform001675	-	1	1	1	988959
Gene000814	Isoform001676	-	1	1	1	988990
Gene000815	Isoform001677	-	1	1	1	995820
Gene000815	Isoform001678	-	4	3	2|1|1	995821|995878|995905
Gene000815	Isoform001679	-	1	1	1	995899
Gene000816	Isoform001680	-	1	1	1	1009324
Gene000817	Isoform001681	-	1	1	1	1021299
Gene000818	Isoform001682	-	1	1	1	1031240
Gene000818	Isoform001683	-	5	5	1|1|1|1|1	1033191|1033281|1033361|1033435|1033605
Gene000818	Isoform001684	-	1	1	1	1033191
Gene000818	Isoform001685	-	1	1	1	1033605
Gene000819	Isoform001686	+	1	1	1	479453
Gene000820	Isoform001687	+	2	2	1|1	492949|493009
Gene000821	Isoform001688	+	2	2	1|1	506810|506811
Gene000821	Isoform001689	+	2	2	1|1	506781|506811
Gene000822	Isoform001690	+	2	2	1|1	573142|573143
Gene000822	Isoform001691	+	1	1	1	573043
Gene000823	Isoform001692	+	1	1	1	603712
Gene000823	Isoform001693	+	1	1	1	603528
Gene000823	Isoform001694	+	1	1	1	603585
Gene000823	Isoform001695	+	1	1	1	603556
Gene000824	Isoform001696	+	1	1	1	705023
Gene000825	Isoform001697	+	1	1	1	731103
Gene000825	Isoform001698	+	1	1	1	727733
Gene000826	Isoform001699	+	1	1	1	751167
Gene000827	Isoform001700	+	4	3	1|1|2	782236|782304|782485
Gene000827	Isoform001701	+	1	1	1	782304
Gene000828	Isoform001702	+	4	4	1|1|1|1	789069|789075|789082|789237
Gene000829	Isoform001703	-	1	1	1	86262
Gene000830	Isoform001704	-	3	3	1|1|1	306349|306400|306465
Gene000831	Isoform001705	-	4	4	1|1|1|1	556110|556112|556136|556204
Gene000831	Isoform001706	-	2	2	1|1	556115|556204
Gene000832	Isoform001707	-	1	1	1	573589
Gene000832	Isoform001708	-	1	1	1	573591
Gene000833	Isoform001709	-	3	3	1|1|1	581459|581462|581515
Gene000834	Isoform001710	-	2	2	1|1	662908|662947
Gene000835	Isoform001711	-	1	1	1	756893
Gene000835	Isoform001712	-	1	1	1	756926
Gene000835	Isoform001713	-	1	1	1	756944
Gene000835	Isoform001714	-	1	1	1	756944
Gene000835	Isoform001715	-	1	1	1	756894
Gene000835	Isoform001716	-	3	2	2|1	756896|756922
Gene000835	Isoform001717	-	1	1	1	756896
Gene000835	Isoform001718	-	1	1	1	756897
Gene000835	Isoform001719	-	1	1	1	756907
Gene000835	Isoform001720	-	1	1	1	756922
Gene000836	Isoform001721	-	1	1	1	791567
Gene000837	Isoform001722	-	3	2	2|1	800104|800170
Gene000838	Isoform001723	+	3	3	1|1|1	13628|13629|13764
Gene000838	Isoform001724	+	1	1	1	16535
Gene000839	Isoform001725	+	1	1	1	23871
Gene000840	Isoform001726	+	1	1	1	57444
Gene000840	Isoform001727	+	1	1	1	57505
Gene000840	Isoform001728	+	1	1	1	57420
Gene000841	Isoform001729	+	1	1	1	60122
Gene000842	Isoform001730	+	4	4	1|1|1|1	82898|82972|82974|83130
Gene000842	Isoform001731	+	1	1	1	82976
Gene000843	Isoform001732	+	1	1	1	106070
Gene000843	Isoform001733	+	2	2	1|1	106072|106139
Gene000843	Isoform001734	+	1	1	1	106120
Gene000843	Isoform001735	+	1	1	1	106073
Gene000843	Isoform001736	+	1	1	1	106087
Gene000844	Isoform001737	+	6	5	1|1|1|2|1	160767|160776|160810|160883|161026
Gene000844	Isoform001738	+	1	1	1	161007
Gene000844	Isoform001739	+	1	1	1	160997
Gene000844	Isoform001740	+	1	1	1	157556
Gene000844	Isoform001741	+	1	1	1	161004
Gene000845	Isoform001742	+	1	1	1	176406
Gene000846	Isoform001743	+	1	1	1	176809
Gene000847	Isoform001744	+	1	1	1	188063
Gene000848	Isoform001745	-	1	1	1	15341
Gene000849	Isoform001746	-	1	1	1	24505
Gene000849	Isoform001747	-	1	1	1	77214
Gene000849	Isoform001748	-	3	3	1|1|1	84214|84291|85960
Gene000849	Isoform001749	-	3	3	1|1|1	92144|92148|92149
Gene000849	Isoform001750	-	1	1	1	92148
Gene000849	Isoform001751	-	3	3	1|1|1	110541|110574|110608
Gene000849	Isoform001752	-	1	1	1	110635
Gene000850	Isoform001753	-	5	5	1|1|1|1|1	126600|126613|126690|126742|126756
Gene000851	Isoform001754	-	1	1	1	154542
Gene000852	Isoform001755	-	3	3	1|1|1	178526|178541|178689
Gene000853	Isoform001756	-	1	1	1	200540
Gene000854	Isoform001757	-	1	1	1	314922
Gene000855	Isoform001758	-	1	1	1	579684
Gene000856	Isoform001759	+	6	5	2|1|1|1|1	268229|268235|268259|268263|268342
Gene000856	Isoform001760	+	1	1	1	268202
Gene000856	Isoform001761	+	1	1	1	268160
Gene000857	Isoform001762	+	1	1	1	467004
Gene000858	Isoform001763	+	1	1	1	620719
Gene000859	Isoform001764	+	4	4	1|1|1|1	650901|651003|651065|651219
Gene000860	Isoform001765	+	1	1	1	673011
Gene000860	Isoform001766	+	1	1	1	673010
Gene000861	Isoform001767	+	1	1	1	682100
Gene000862	Isoform001768	+	6	6	1|1|1|1|1|1	691837|691945|691947|691956|692075|692406
Gene000862	Isoform001769	+	1	1	1	692036
Gene000862	Isoform001770	+	1	1	1	692009
Gene000862	Isoform001771	+	1	1	1	692097
Gene000862	Isoform001772	+	1	1	1	691998
Gene000863	Isoform001773	+	1	1	1	713772
Gene000864	Isoform001774	+	1	1	1	719128
Gene000865	Isoform001775	+	1	1	1	745943
Gene000865	Isoform001776	+	1	1	1	745955
Gene000865	Isoform001777	+	1	1	1	745927
Gene000865	Isoform001778	+	1	1	1	745861
Gene000865	Isoform001779	+	1	1	1	745833
Gene000865	Isoform001780	+	1	1	1	745929
Gene000865	Isoform001781	+	1	1	1	745965
Gene000865	Isoform001782	+	1	1	1	745831
Gene000865	Isoform001783	+	1	1	1	746004
Gene000865	Isoform001784	+	1	1	1	745833
Gene000866	Isoform001785	+	1	1	1	816368
Gene000866	Isoform001786	+	1	1	1	816379
Gene000866	Isoform001787	+	1	1	1	816177
Gene000867	Isoform001788	+	3	3	1|1|1	831419|831509|831580
Gene000868	Isoform001789	+	3	3	1|1|1	857650|857675|857682
Gene000868	Isoform001790	+	1	1	1	855151
Gene000868	Isoform001791	+	4	4	1|1|1|1	857650|857675|857685|857909
Gene000868	Isoform001792	+	2	2	1|1	857662|857683
Gene000868	Isoform001793	+	1	1	1	849565
Gene000868	Isoform001794	+	1	1	1	855297
Gene000868	Isoform001795	+	1	1	1	857646
Gene000868	Isoform001796	+	1	1	1	855294
Gene000868	Isoform001797	+	1	1	1	857652
Gene000868	Isoform001798	+	1	1	1	857651
Gene000868	Isoform001799	+	1	1	1	846704
Gene000868	Isoform001800	+	1	1	1	857650
Gene000868	Isoform001801	+	1	1	1	849565
Gene000868	Isoform001802	+	6	3	1|2|3	857650|857651|857662
Gene000868	Isoform001803	+	1	1	1	857673
Gene000868	Isoform001804	+	1	1	1	857650
Gene000868	Isoform001805	+	1	1	1	857661
Gene000868	Isoform001806	+	1	1	1	859259
Gene000868	Isoform001807	+	1	1	1	857662
Gene000868	Isoform001808	+	26	13	1|3|7|1|1|5|1|1|2|1|1|1|1	857645|857647|857650|857651|857661|857662|857663|857672|857673|857674|857675|857685|857910
Gene000868	Isoform001809	+	1	1	1	855151
Gene000869	Isoform001810	+	1	1	1	865265
Gene000870	Isoform001811	-	1	1	1	152785
Gene000870	Isoform001812	-	1	1	1	152830
Gene000870	Isoform001813	-	1	1	1	152834
Gene000870	Isoform001814	-	1	1	1	158412
Gene000871	Isoform001815	-	2	2	1|1	354941|354999
Gene000872	Isoform001816	-	1	1	1	426245
Gene000872	Isoform001817	-	1	1	1	426315
Gene000873	Isoform001818	-	4	4	1|1|1|1	437540|437593|437790|437927
Gene000873	Isoform001819	-	1	1	1	437565
Gene000873	Isoform001820	-	1	1	1	437843
Gene000873	Isoform001821	-	1	1	1	443918
Gene000874	Isoform001822	-	1	1	1	452675
Gene000875	Isoform001823	-	1	1	1	468181
Gene000876	Isoform001824	-	1	1	1	478160
Gene000877	Isoform001825	-	2	2	1|1	491422|491596
Gene000878	Isoform001826	-	2	2	1|1	505417|505497
Gene000879	Isoform001827	-	1	1	1	515496
Gene000879	Isoform001828	-	1	1	1	515562
Gene000880	Isoform001829	-	5	5	1|1|1|1|1	521439|521571|523134|523304|523439
Gene000880	Isoform001830	-	1	1	1	523285
Gene000880	Isoform001831	-	1	1	1	523312
Gene000880	Isoform001832	-	1	1	1	523312
Gene000881	Isoform001833	-	4	4	1|1|1|1	533465|533487|533525|533539
Gene000882	Isoform001834	-	1	1	1	541731
Gene000883	Isoform001835	-	3	3	1|1|1	564012|564096|564185
Gene000884	Isoform001836	-	1	1	1	651399
Gene000885	Isoform001837	-	1	1	1	657124
Gene000886	Isoform001838	-	1	1	1	659709
Gene000887	Isoform001839	-	5	5	1|1|1|1|1	682256|682672|682767|683009|683031
Gene000887	Isoform001840	-	2	2	1|1	682761|682776
Gene000888	Isoform001841	-	1	1	1	816419
Gene000888	Isoform001842	-	1	1	1	818649
Gene000888	Isoform001843	-	1	1	1	819782
Gene000889	Isoform001844	+	1	1	1	452078
Gene000890	Isoform001845	+	5	5	1|1|1|1|1	459138|459148|459368|459412|459509
Gene000890	Isoform001846	+	2	2	1|1	459402|459484
Gene000890	Isoform001847	+	1	1	1	459144
Gene000891	Isoform001848	+	1	1	1	466202
Gene000891	Isoform001849	+	1	1	1	466107
Gene000892	Isoform001850	+	13	10	2|2|1|1|1|1|2|1|1|1	626034|626096|626097|626171|626225|626241|626242|626252|626253|626270
Gene000892	Isoform001851	+	1	1	1	626237
Gene000893	Isoform001852	+	1	1	1	629686
Gene000894	Isoform001853	+	1	1	1	634479
Gene000894	Isoform001854	+	3	3	1|1|1	632735|632794|632906
Gene000894	Isoform001855	+	1	1	1	632906
Gene000895	Isoform001856	+	2	2	1|1	636179|636236
Gene000896	Isoform001857	+	1	1	1	659287
Gene000896	Isoform001858	+	1	1	1	659287
Gene000897	Isoform001859	+	1	1	1	698895
Gene000898	Isoform001860	-	8	4	1|1|3|3	331677|331794|331805|331806
Gene000899	Isoform001861	-	1	1	1	336190
Gene000899	Isoform001862	-	1	1	1	337002
Gene000900	Isoform001863	-	1	1	1	355301
Gene000900	Isoform001864	-	1	1	1	355331
Gene000900	Isoform001865	-	1	1	1	355360
Gene000900	Isoform001866	-	1	1	1	355383
Gene000901	Isoform001867	-	1	1	1	378755
Gene000901	Isoform001868	-	1	1	1	378880
Gene000902	Isoform001869	-	1	1	1	439536
Gene000903	Isoform001870	-	1	1	1	590248
Gene000904	Isoform001871	-	1	1	1	600297
Gene000904	Isoform001872	-	1	1	1	601678
Gene000905	Isoform001873	-	1	1	1	667538
Gene000905	Isoform001874	-	3	3	1|1|1	668128|668204|668337
Gene000905	Isoform001875	-	7	7	1|1|1|1|1|1|1	668128|668207|668211|668300|668338|668407|668412
Gene000905	Isoform001876	-	1	1	1	668345
Gene000905	Isoform001877	-	1	1	1	668412
Gene000905	Isoform001878	-	2	2	1|1	675062|675066
Gene000906	Isoform001879	-	1	1	1	682543
Gene000906	Isoform001880	-	3	3	1|1|1	682543|682687|682689
Gene000906	Isoform001881	-	2	2	1|1	682554|682687
Gene000906	Isoform001882	-	1	1	1	682722
Gene000907	Isoform001883	-	3	3	1|1|1	696351|696504|696633
Gene000908	Isoform001884	-	1	1	1	713324
Gene000909	Isoform001885	+	1	1	1	247913
Gene000909	Isoform001886	+	1	1	1	247917
Gene000909	Isoform001887	+	2	2	1|1	247913|247914
Gene000909	Isoform001888	+	2	2	1|1	247825|247918
Gene000909	Isoform001889	+	1	1	1	247917
Gene000909	Isoform001890	+	1	1	1	247917
Gene000909	Isoform001891	+	7	5	1|1|1|3|1	247861|247911|247912|247917|247922
Gene000909	Isoform001892	+	9	5	1|2|1|4|1	247807|247808|247860|247912|247913
Gene000909	Isoform001893	+	1	1	1	247917
Gene000909	Isoform001894	+	1	1	1	254232
Gene000909	Isoform001895	+	1	1	1	247917
Gene000909	Isoform001896	+	2	2	1|1	247821|247896
Gene000909	Isoform001897	+	3	2	1|2	247912|247917
Gene000909	Isoform001898	+	1	1	1	247917
Gene000909	Isoform001899	+	2	2	1|1	247886|247914
Gene000909	Isoform001900	+	2	2	1|1	247808|247860
Gene000909	Isoform001901	+	1	1	1	247912
Gene000909	Isoform001902	+	1	1	1	247822
Gene000909	Isoform001903	+	1	1	1	247917
Gene000909	Isoform001904	+	1	1	1	247917
Gene000909	Isoform001905	+	2	2	1|1	247808|247884
Gene000909	Isoform001906	+	1	1	1	247913
Gene000909	Isoform001907	+	1	1	1	247914
Gene000909	Isoform001908	+	1	1	1	247914
Gene000909	Isoform001909	+	1	1	1	247917
Gene000909	Isoform001910	+	83	25	9|6|1|1|3|1|2|3|1|1|1|2|1|1|3|11|4|1|17|6|1|3|2|1|1	247807|247808|247810|247820|247822|247823|247860|247861|247872|247873|247874|247885|247886|247906|247911|247912|247913|247914|247917|247918|247919|247931|247932|247950|248035
Gene000909	Isoform001911	+	12	10	1|1|1|1|1|1|2|1|2|1	247806|247808|247819|247822|247912|247914|247917|247918|247931|247932
Gene000909	Isoform001912	+	41	19	4|4|3|2|1|1|3|2|1|1|1|1|1|8|1|1|4|1|1	247806|247807|247808|247821|247822|247859|247860|247861|247868|247870|247874|247885|247905|247912|247913|247914|247917|247918|247996
Gene000909	Isoform001913	+	2	2	1|1	247861|247952
Gene000909	Isoform001914	+	1	1	1	247912
Gene000909	Isoform001915	+	1	1	1	247807
Gene000909	Isoform001916	+	1	1	1	247914
Gene000909	Isoform001917	+	1	1	1	254345
Gene000909	Isoform001918	+	4	3	1|2|1	247806|247808|247916
Gene000909	Isoform001919	+	1	1	1	247806
Gene000909	Isoform001920	+	1	1	1	245460
Gene000909	Isoform001921	+	1	1	1	247821
Gene000909	Isoform001922	+	1	1	1	247807
Gene000909	Isoform001923	+	2	2	1|1	247914|247917
Gene000909	Isoform001924	+	3	3	1|1|1	247821|247861|247914
Gene000909	Isoform001925	+	1	1	1	247912
Gene000909	Isoform001926	+	1	1	1	247912
Gene000909	Isoform001927	+	1	1	1	247917
Gene000909	Isoform001928	+	1	1	1	247914
Gene000909	Isoform001929	+	1	1	1	247917
Gene000909	Isoform001930	+	1	1	1	247893
Gene000909	Isoform001931	+	1	1	1	247917
Gene000909	Isoform001932	+	1	1	1	247912
Gene000909	Isoform001933	+	1	1	1	247917
Gene000909	Isoform001934	+	1	1	1	247857
Gene000909	Isoform001935	+	1	1	1	247808
Gene000910	Isoform001936	+	1	1	1	316305
Gene000910	Isoform001937	+	1	1	1	316300
Gene000910	Isoform001938	+	1	1	1	320198
Gene000910	Isoform001939	+	1	1	1	316304
Gene000910	Isoform001940	+	1	1	1	320109
Gene000911	Isoform001941	+	1	1	1	373191
Gene000912	Isoform001942	+	1	1	1	444155
Gene000912	Isoform001943	+	1	1	1	444154
Gene000913	Isoform001944	+	8	8	1|1|1|1|1|1|1|1	449640|449756|449838|449840|449896|449916|449933|449965
Gene000913	Isoform001945	+	1	1	1	449991
Gene000913	Isoform001946	+	1	1	1	449943
Gene000914	Isoform001947	+	1	1	1	559742
Gene000914	Isoform001948	+	3	3	1|1|1	559151|559441|559640
Gene000915	Isoform001949	+	1	1	1	638486
Gene000916	Isoform001950	+	1	1	1	663275
Gene000916	Isoform001951	+	1	1	1	663191
Gene000916	Isoform001952	+	1	1	1	663200
Gene000916	Isoform001953	+	1	1	1	663190
Gene000917	Isoform001954	-	1	1	1	52206
Gene000918	Isoform001955	-	1	1	1	163316
Gene000919	Isoform001956	-	1	1	1	212819
Gene000919	Isoform001957	-	1	1	1	212820
Gene000920	Isoform001958	-	1	1	1	255937
Gene000920	Isoform001959	-	2	2	1|1	255956|256056
Gene000920	Isoform001960	-	1	1	1	256049
Gene000920	Isoform001961	-	1	1	1	257565
Gene000920	Isoform001962	-	1	1	1	261371
Gene000920	Isoform001963	-	1	1	1	261371
Gene000921	Isoform001964	-	7	7	1|1|1|1|1|1|1	287706|287711|287764|287768|287793|287794|287824
Gene000922	Isoform001965	-	1	1	1	388182
Gene000923	Isoform001966	-	1	1	1	405041
Gene000924	Isoform001967	+	1	1	1	244578
Gene000925	Isoform001968	+	1	1	1	282001
Gene000926	Isoform001969	+	3	3	1|1|1	290851|290961|291031
Gene000927	Isoform001970	+	1	1	1	381806
Gene000927	Isoform001971	+	1	1	1	381747
Gene000928	Isoform001972	+	1	1	1	388038
Gene000929	Isoform001973	+	1	1	1	395523
Gene000930	Isoform001974	+	3	3	1|1|1	436018|436074|436128
Gene000930	Isoform001975	+	1	1	1	436055
Gene000931	Isoform001976	+	2	2	1|1	464961|465008
Gene000931	Isoform001977	+	1	1	1	465020
Gene000932	Isoform001978	+	1	1	1	531585
Gene000932	Isoform001979	+	13	10	1|1|2|1|1|1|1|1|1|3	531529|531573|531583|531584|531585|531587|531594|531622|531627|531660
Gene000932	Isoform001980	+	1	1	1	531640
Gene000932	Isoform001981	+	2	1	2	531639
Gene000933	Isoform001982	+	1	1	1	544371
Gene000934	Isoform001983	+	1	1	1	699880
Gene000934	Isoform001984	+	13	10	2|1|2|1|1|1|2|1|1|1	699879|699883|699934|699990|700009|700065|700066|700067|700130|700161
Gene000934	Isoform001985	+	1	1	1	699990
Gene000934	Isoform001986	+	1	1	1	699880
Gene000934	Isoform001987	+	1	1	1	699856
Gene000934	Isoform001988	+	1	1	1	699980
Gene000934	Isoform001989	+	1	1	1	699986
Gene000935	Isoform001990	+	1	1	1	704865
Gene000936	Isoform001991	+	1	1	1	708011
Gene000937	Isoform001992	+	7	6	2|1|1|1|1|1	772768|772812|772818|772850|772867|772923
Gene000937	Isoform001993	+	1	1	1	772895
Gene000937	Isoform001994	+	1	1	1	772896
Gene000937	Isoform001995	+	1	1	1	772852
Gene000937	Isoform001996	+	1	1	1	772867
Gene000937	Isoform001997	+	1	1	1	763369
Gene000937	Isoform001998	+	1	1	1	772867
Gene000937	Isoform001999	+	1	1	1	772828
[truncated: 35,505 more rows]
